# Supplementary material for: A new approach to construct a fused 2-ylidene chromene ring: highly regioselective synthesis of novel chromeno quinoxalines
Source: Royal Society of Chemistry journal article supplement (doi:10.1039/c2ob25416f), 2012-01-01

### Copies of $^1\text{H}$ and $^{13}\text{C}$ NMR spectra

**3a**  $^1\text{H}$  NMR (400 MHz,  $\text{DMSO-}d_6$ )

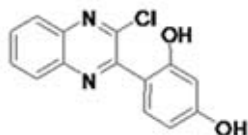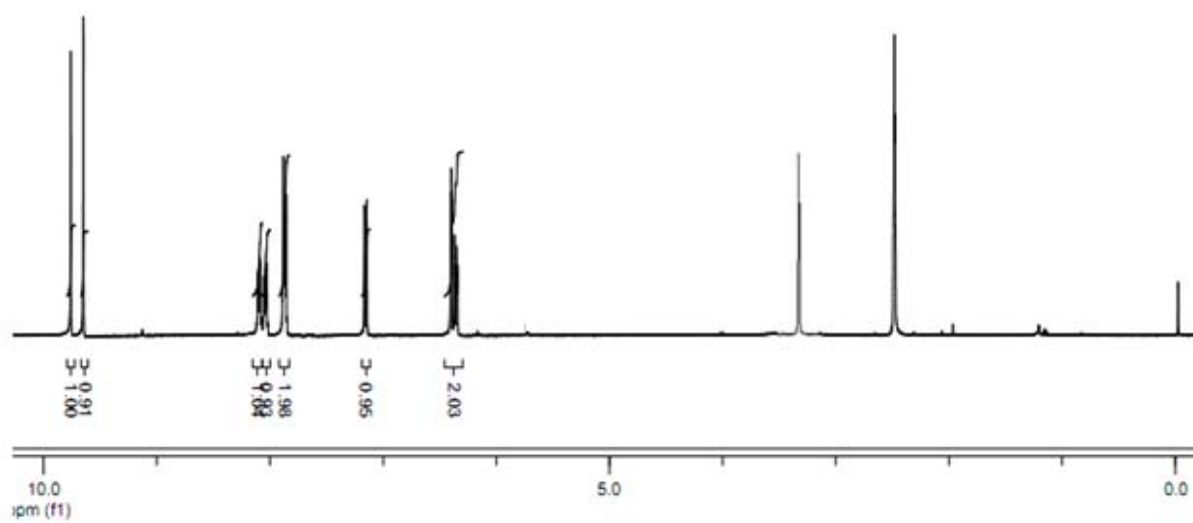

**3a**  $^{13}\text{C}$  NMR (100 MHz,  $\text{DMSO-}d_6$ )

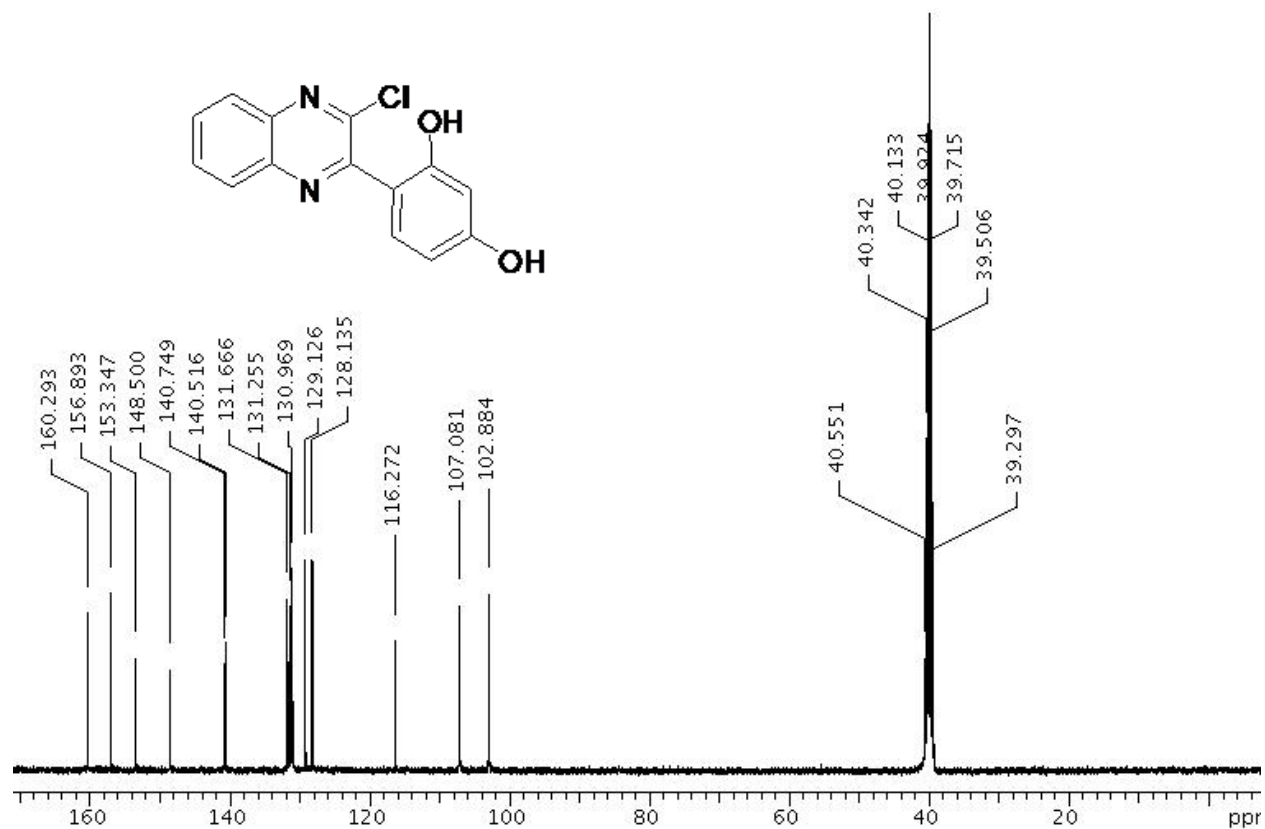

**3b**  $^1\text{H}$  NMR (400 MHz,  $\text{DMSO-}d_6$ )

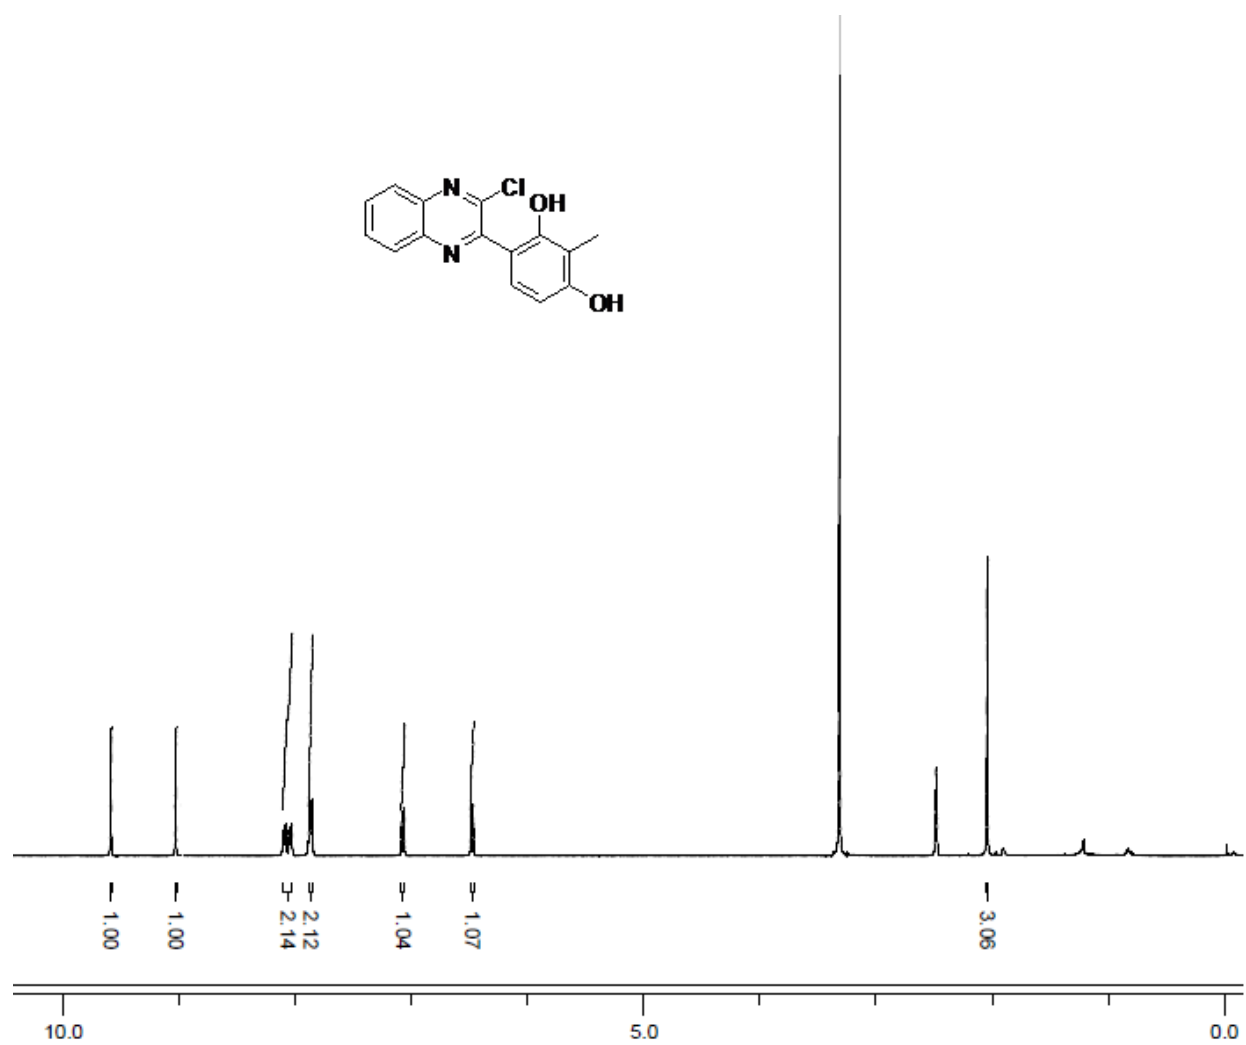

**3b**  $^{13}\text{C}$  NMR (100 MHz, DMSO- $d_6$ )

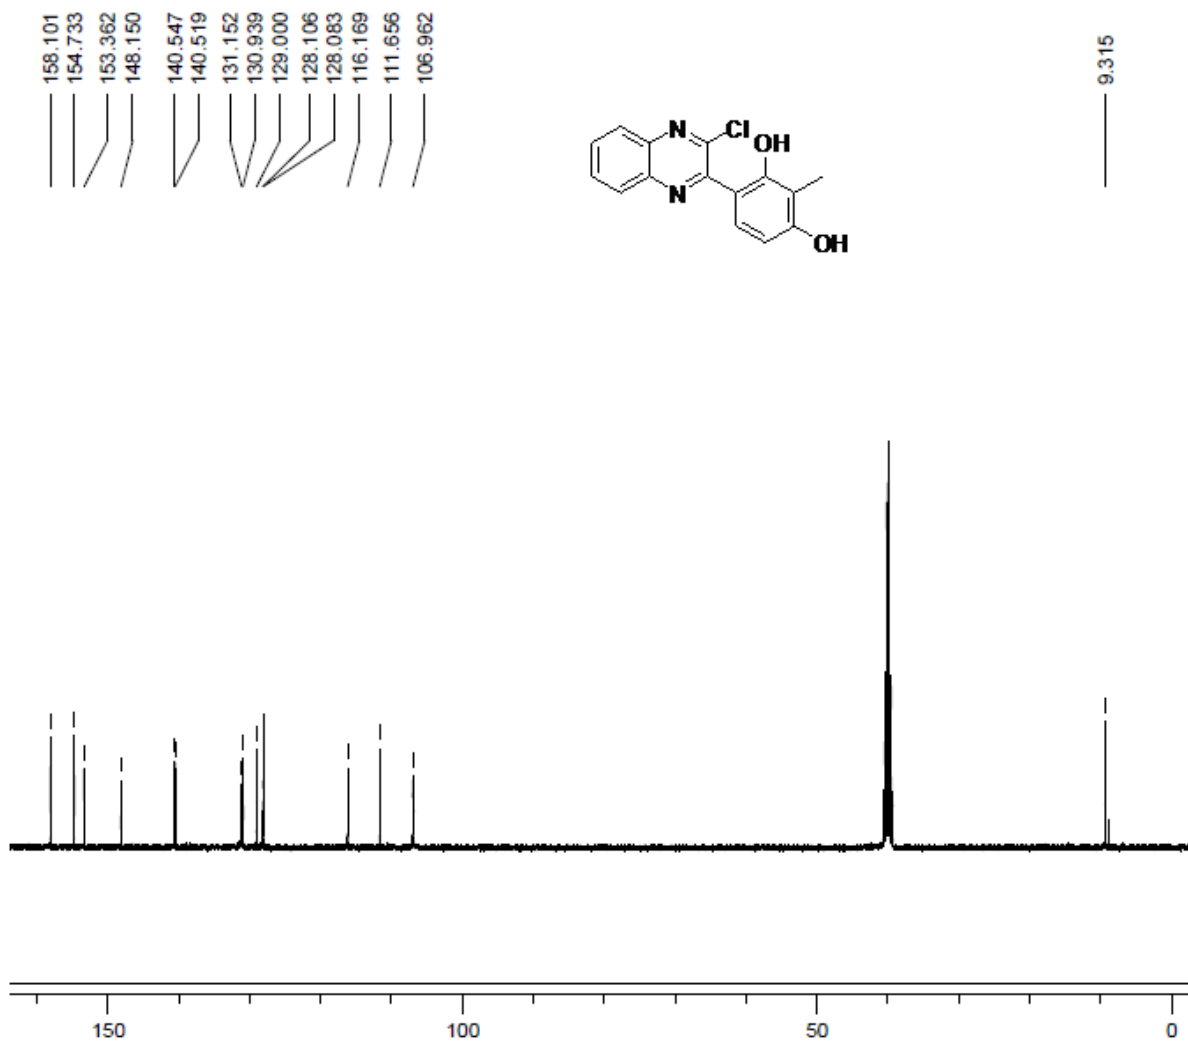

**5a**  $^1\text{H}$  NMR (400 MHz,  $\text{DMSO-}d_6$ )

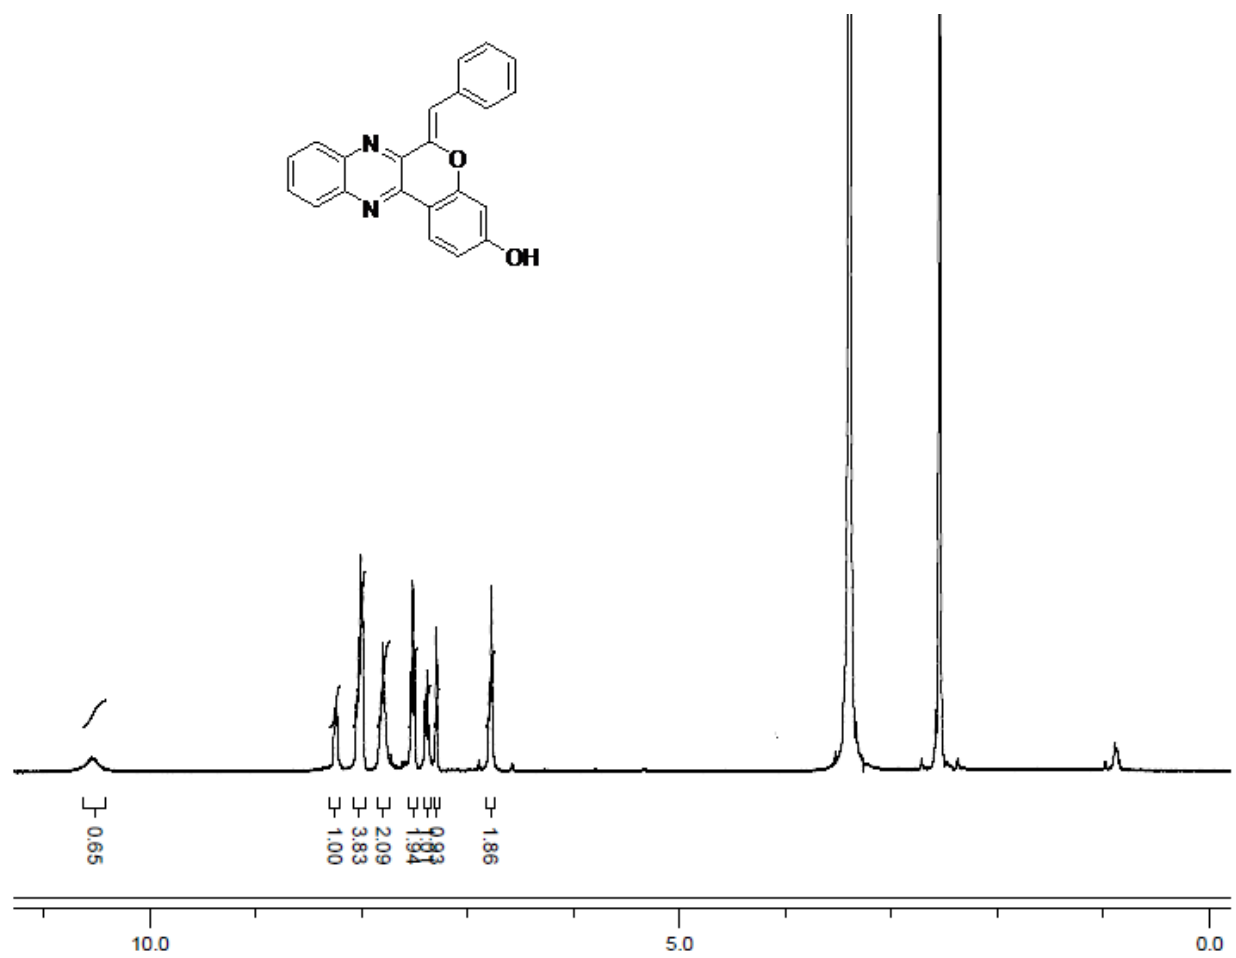

**5a**  $^{13}\text{C}$  NMR (100 MHz,  $\text{DMSO-}d_6$ )

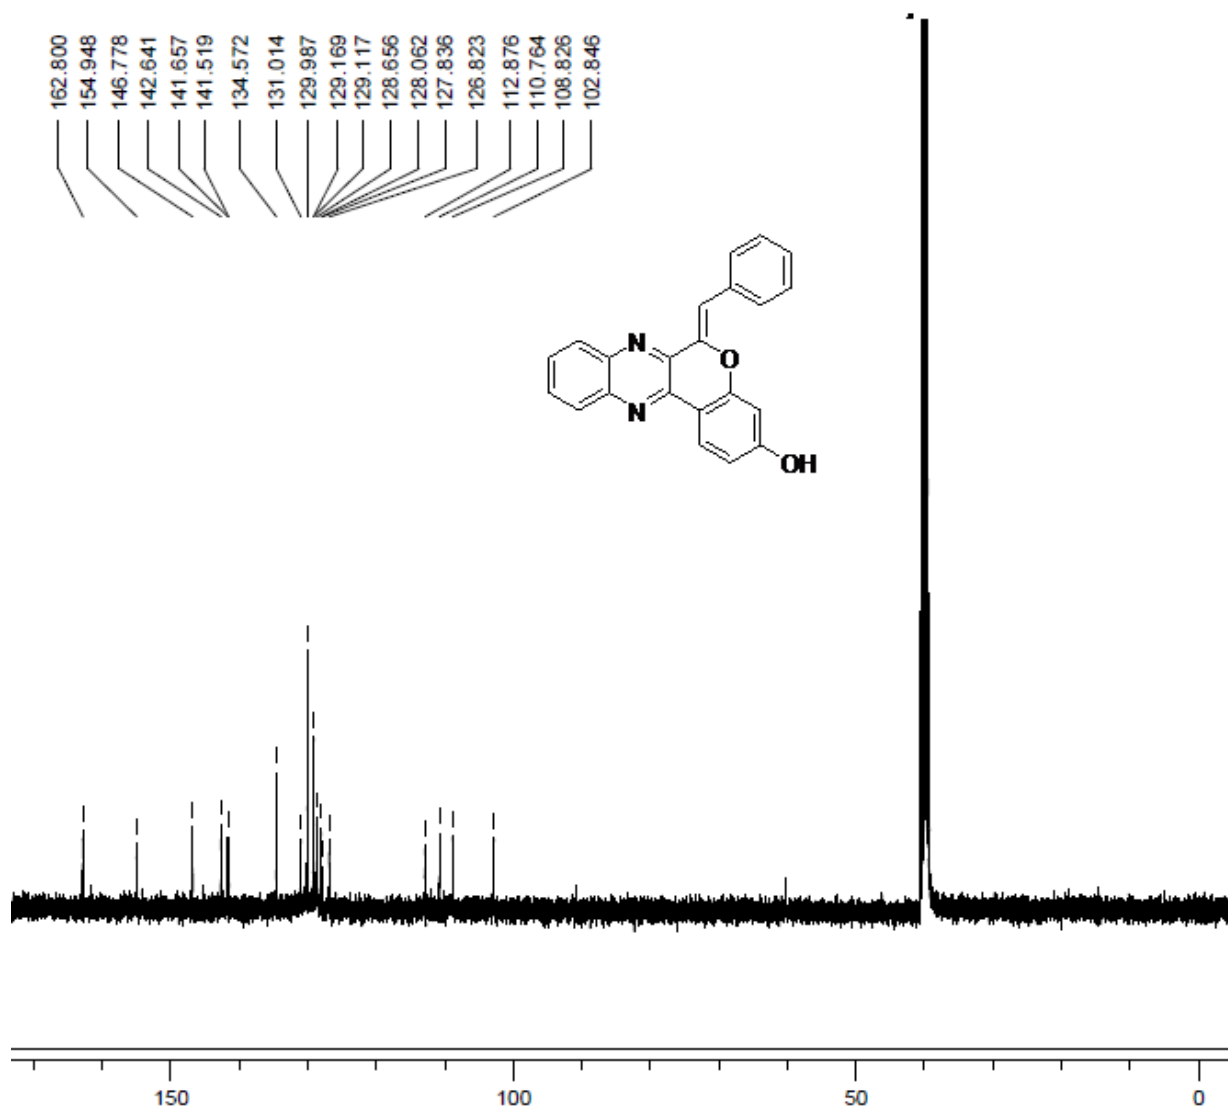

**5b**  $^1\text{H}$  NMR (400 MHz,  $\text{DMSO-}d_6$ )

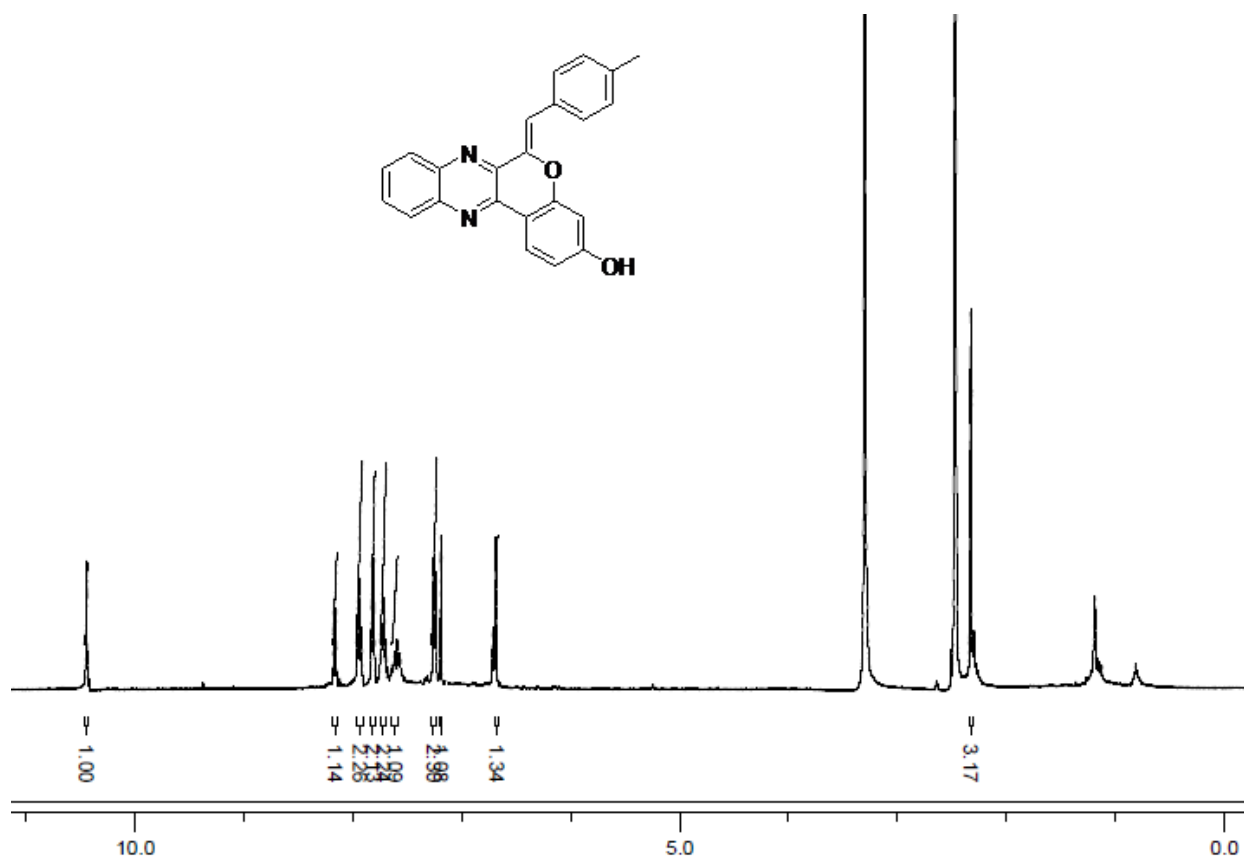

**5b**  $^{13}\text{C}$  NMR (100 MHz,  $\text{DMSO-}d_6$ )

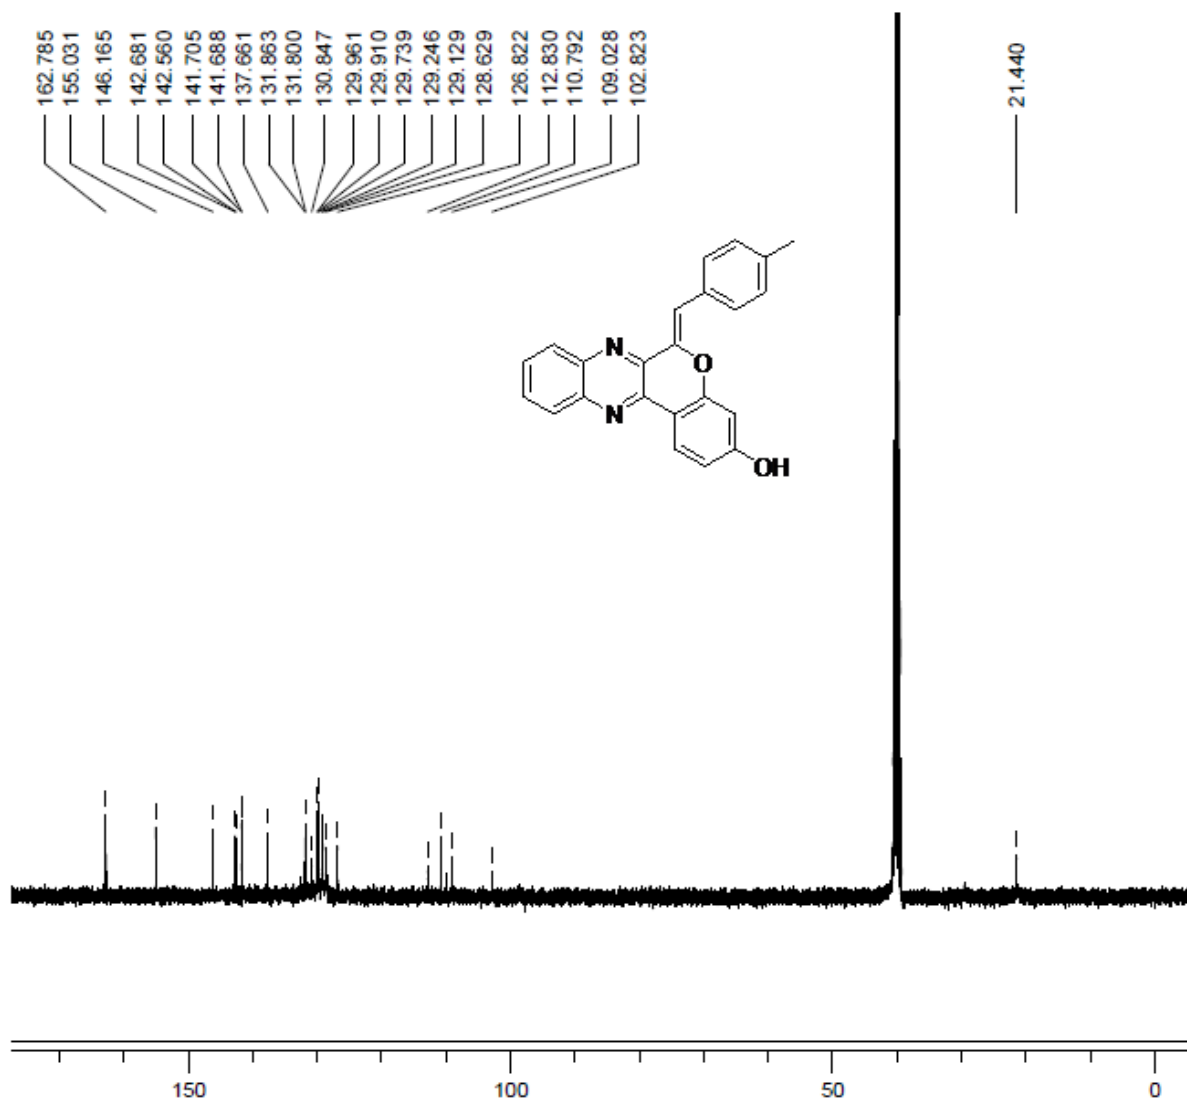



**5c**  $^1\text{H}$  NMR (400 MHz,  $\text{DMSO-}d_6$ )

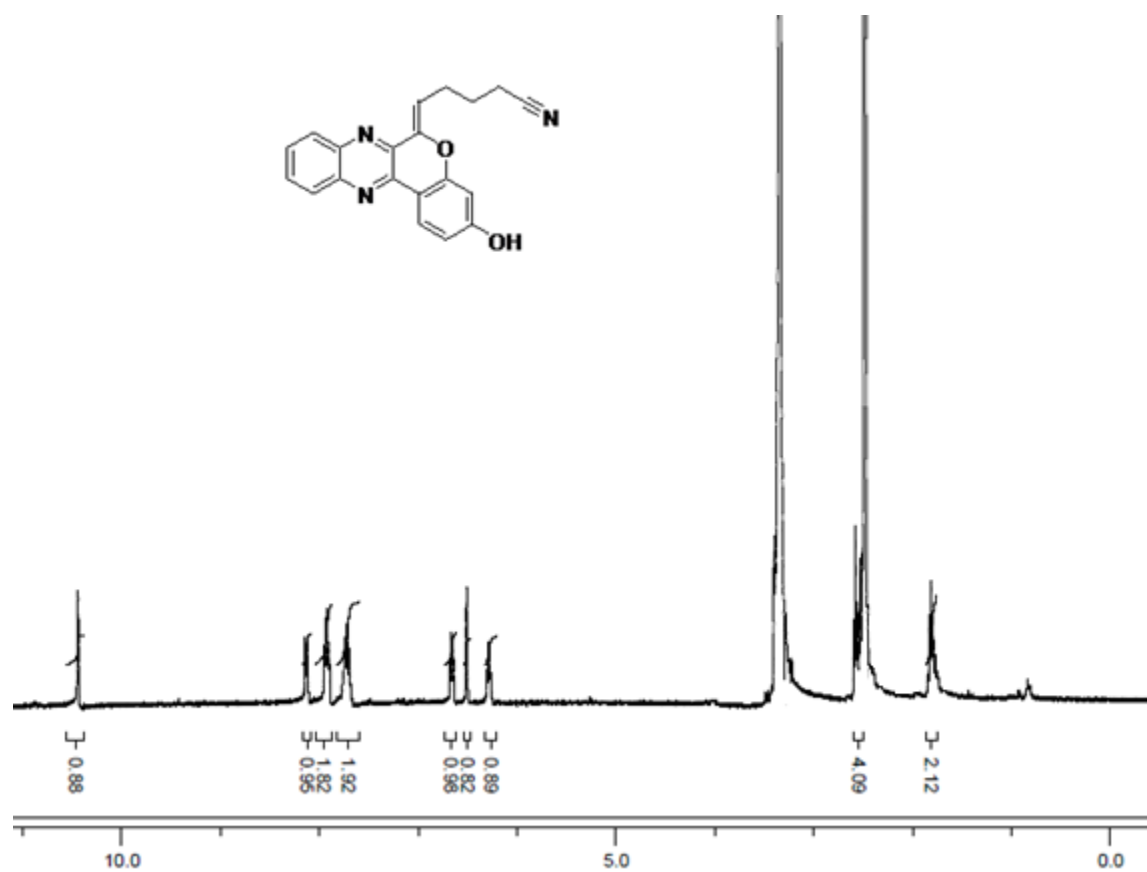

**5c**  $^{13}\text{C}$  NMR (100 MHz,  $\text{DMSO-}d_6$ )

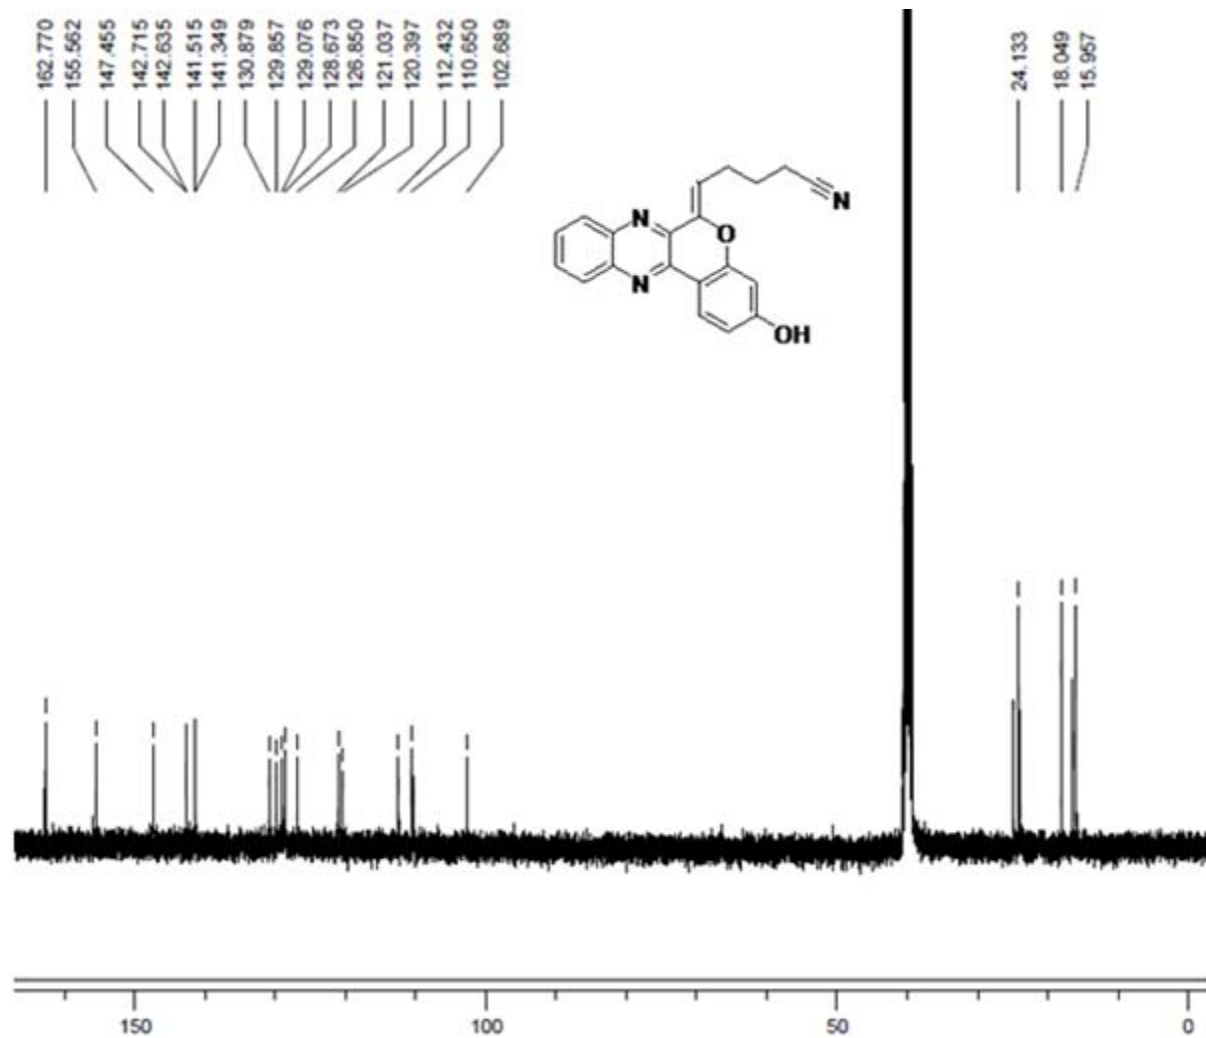

**5d**  $^1\text{H}$  NMR (400 MHz,  $\text{DMSO-}d_6$ )

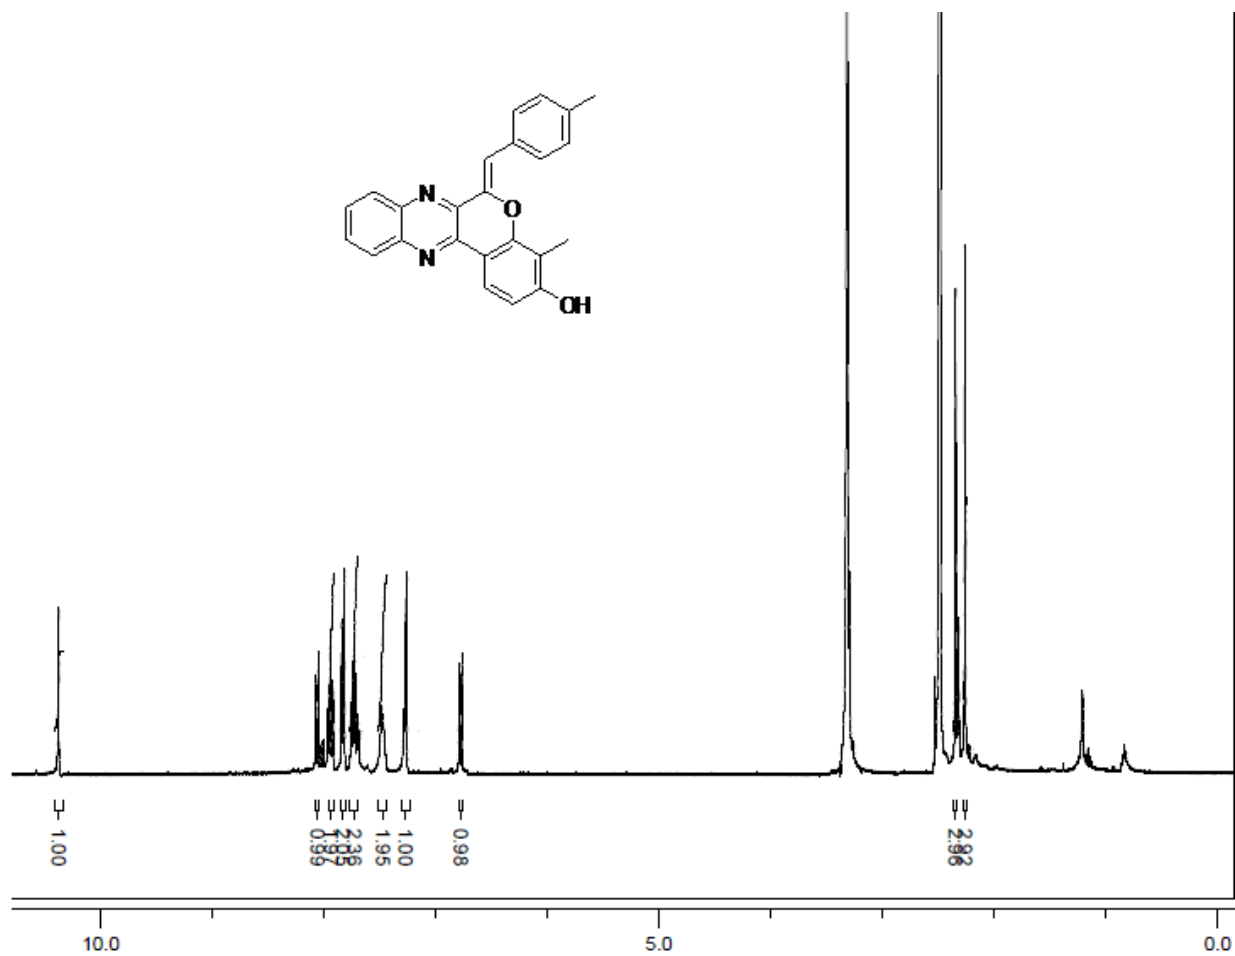

**5d**  $^{13}\text{C}$  NMR (400 MHz,  $\text{DMSO-}d_6$ )

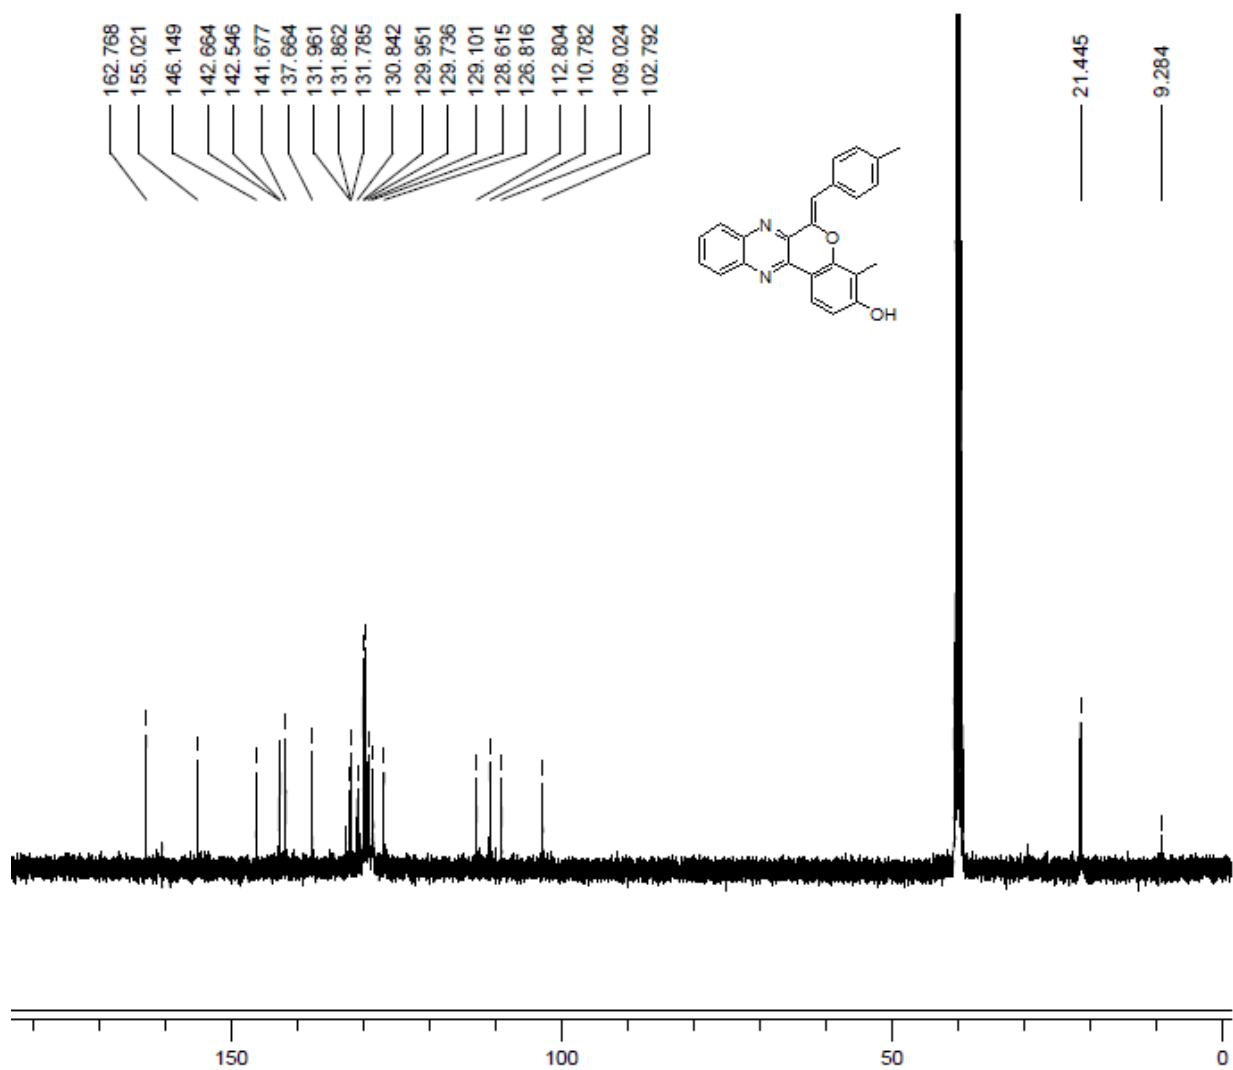

**5e**  $^1\text{H}$  NMR (400 MHz,  $\text{DMSO-}d_6$ )

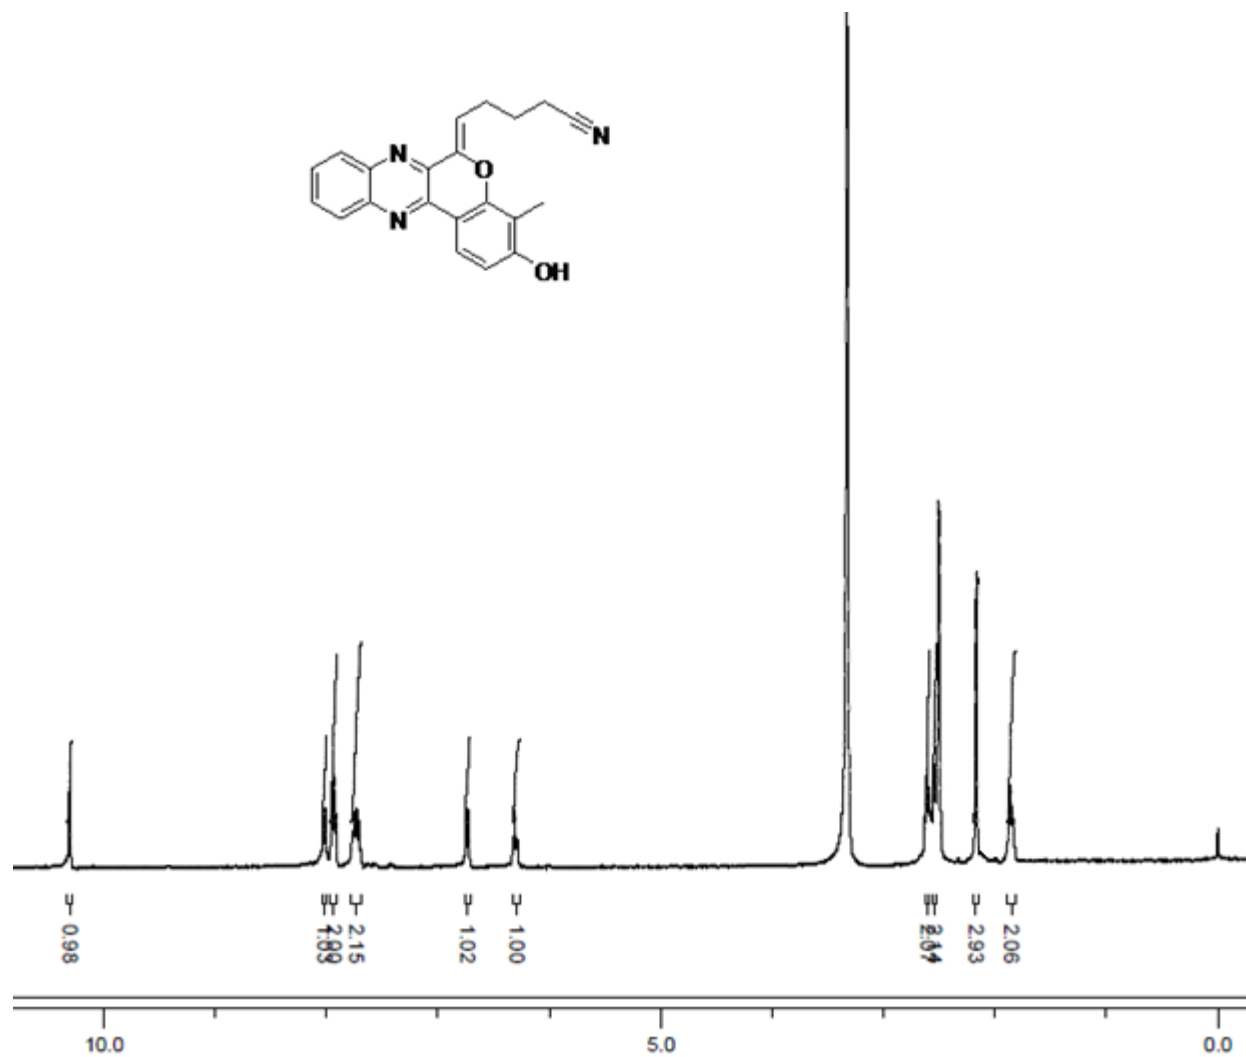

**5e**  $^{13}\text{C}$  NMR (100 MHz, DMSO-*d*<sub>6</sub>)

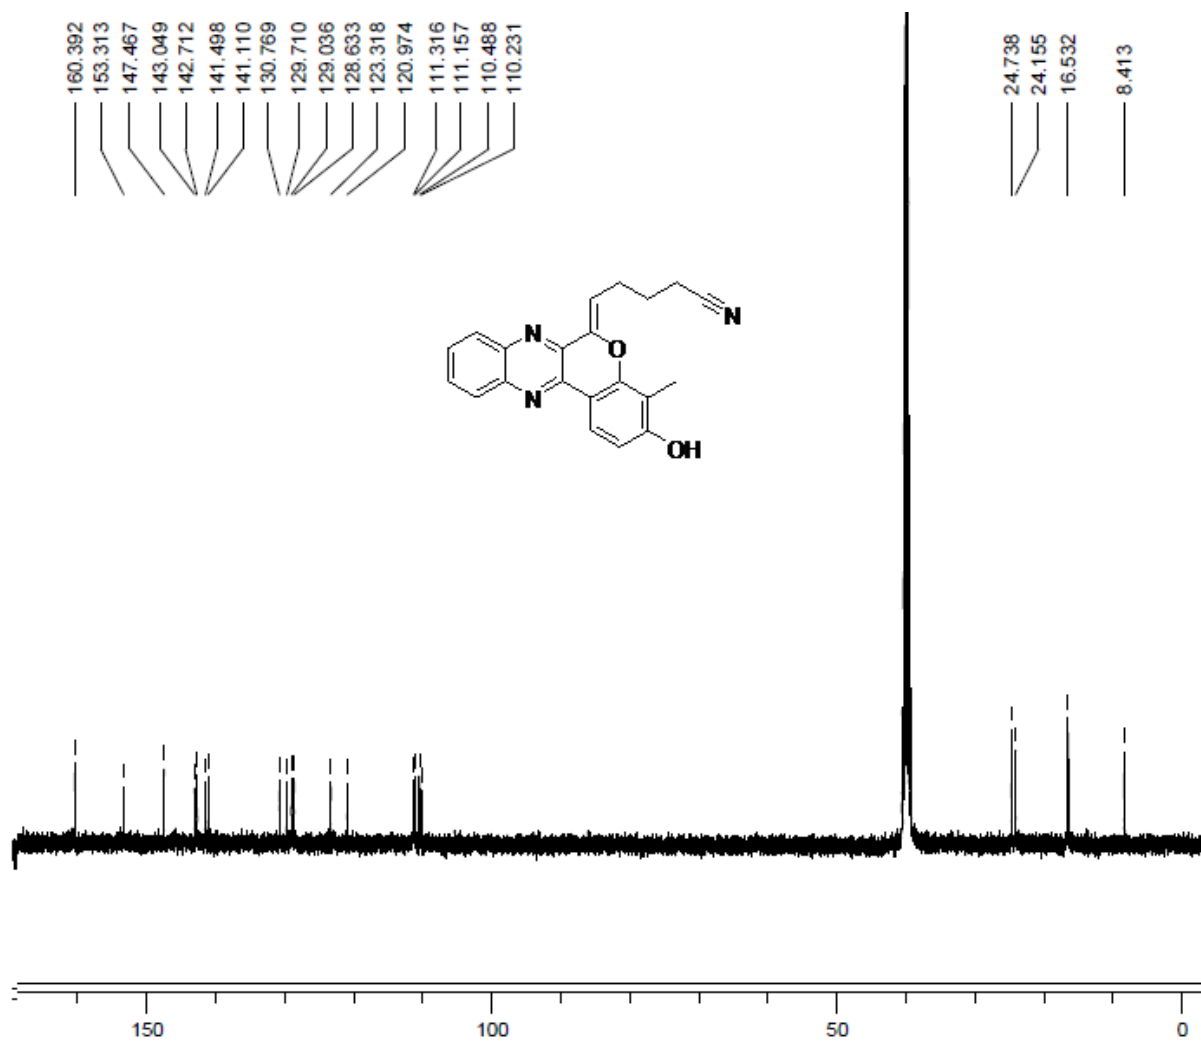

**5f**  $^1\text{H}$  NMR (400 MHz,  $\text{DMSO-}d_6$ )

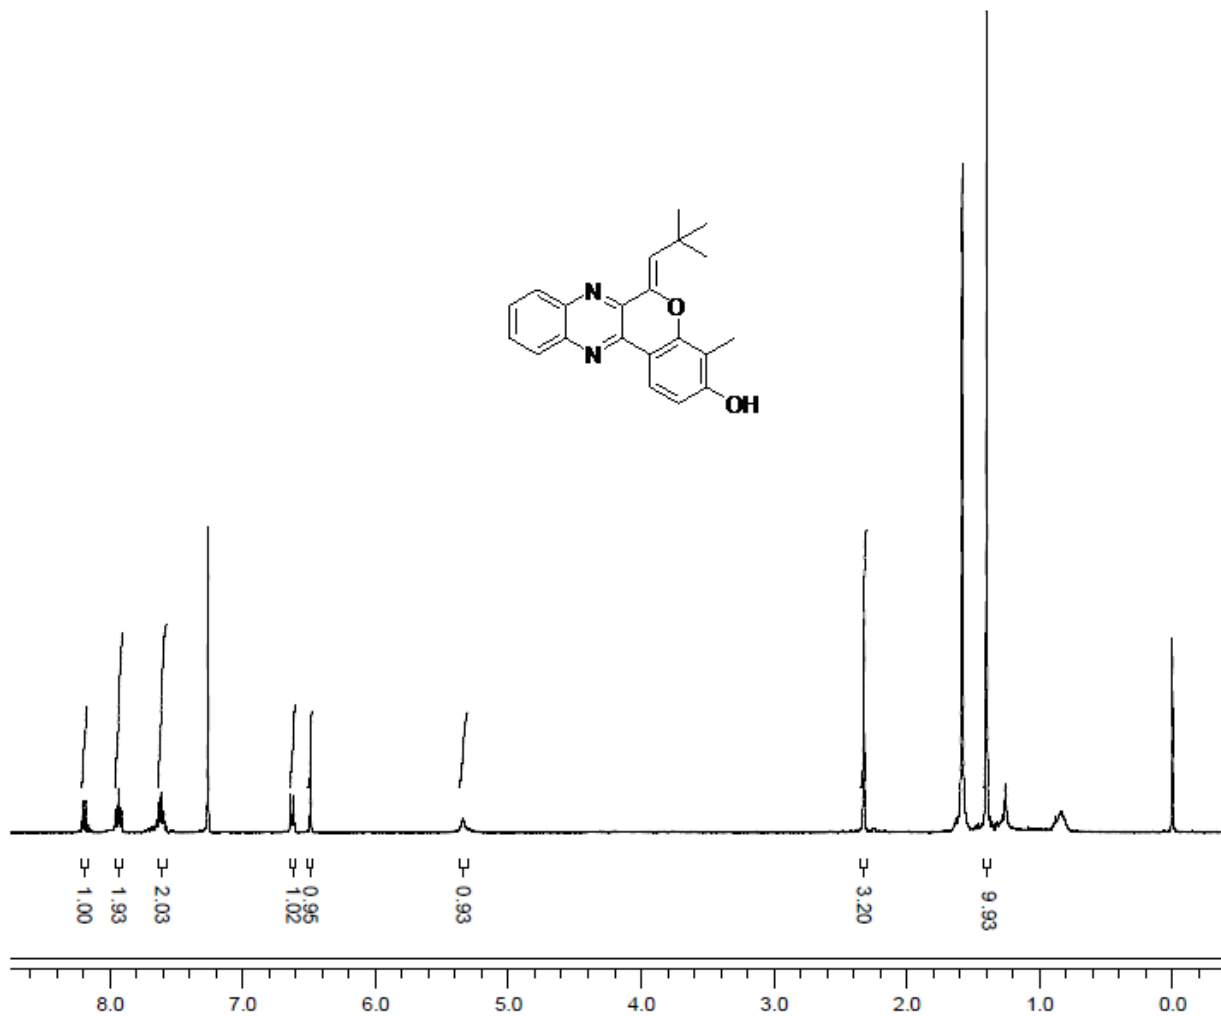

**5f**  $^{13}\text{C}$  NMR (100 MHz,  $\text{DMSO-}d_6$ )

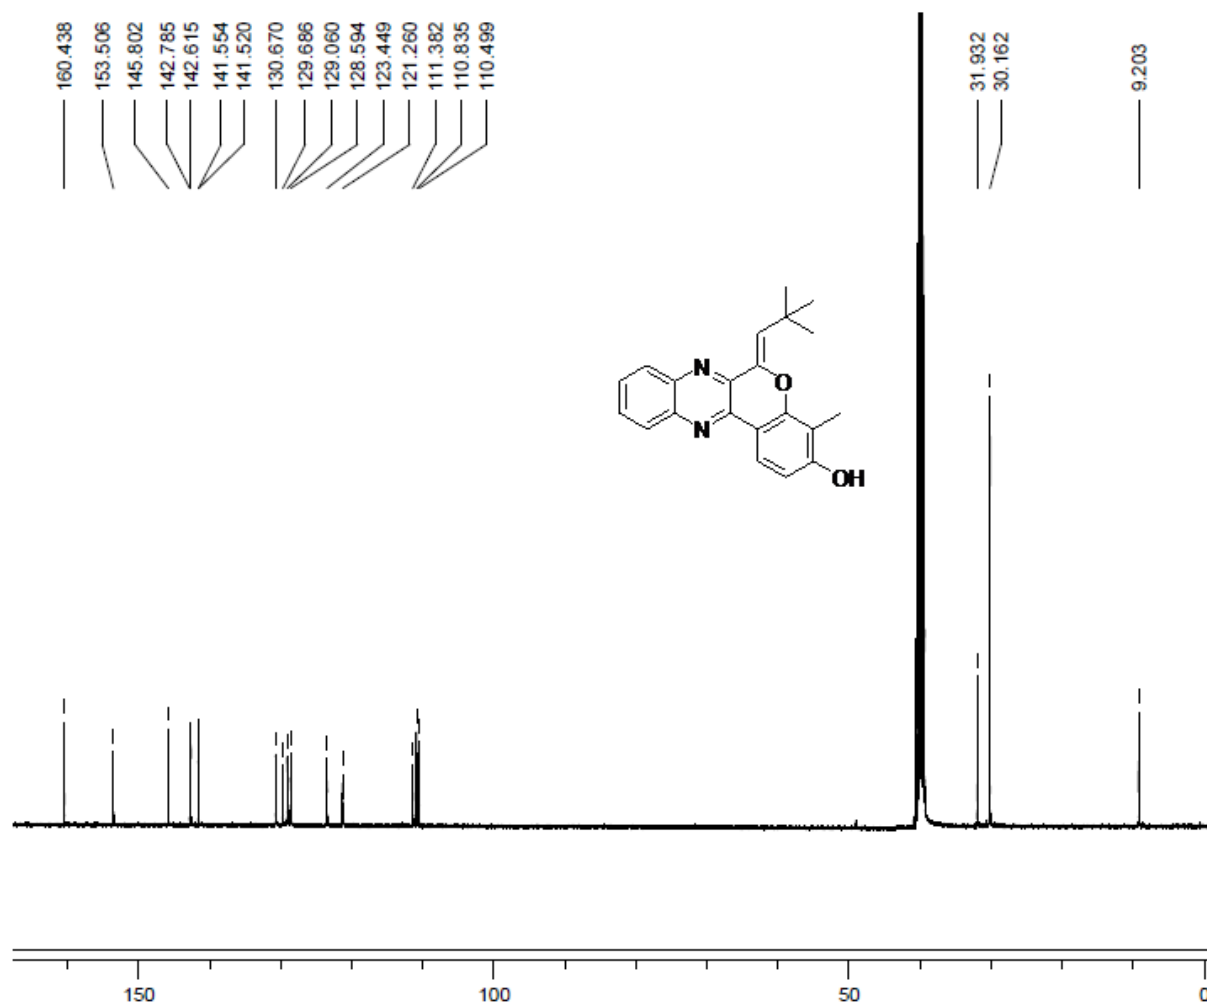



**5g**  $^1\text{H}$  NMR (400 MHz,  $\text{DMSO-}d_6$ )

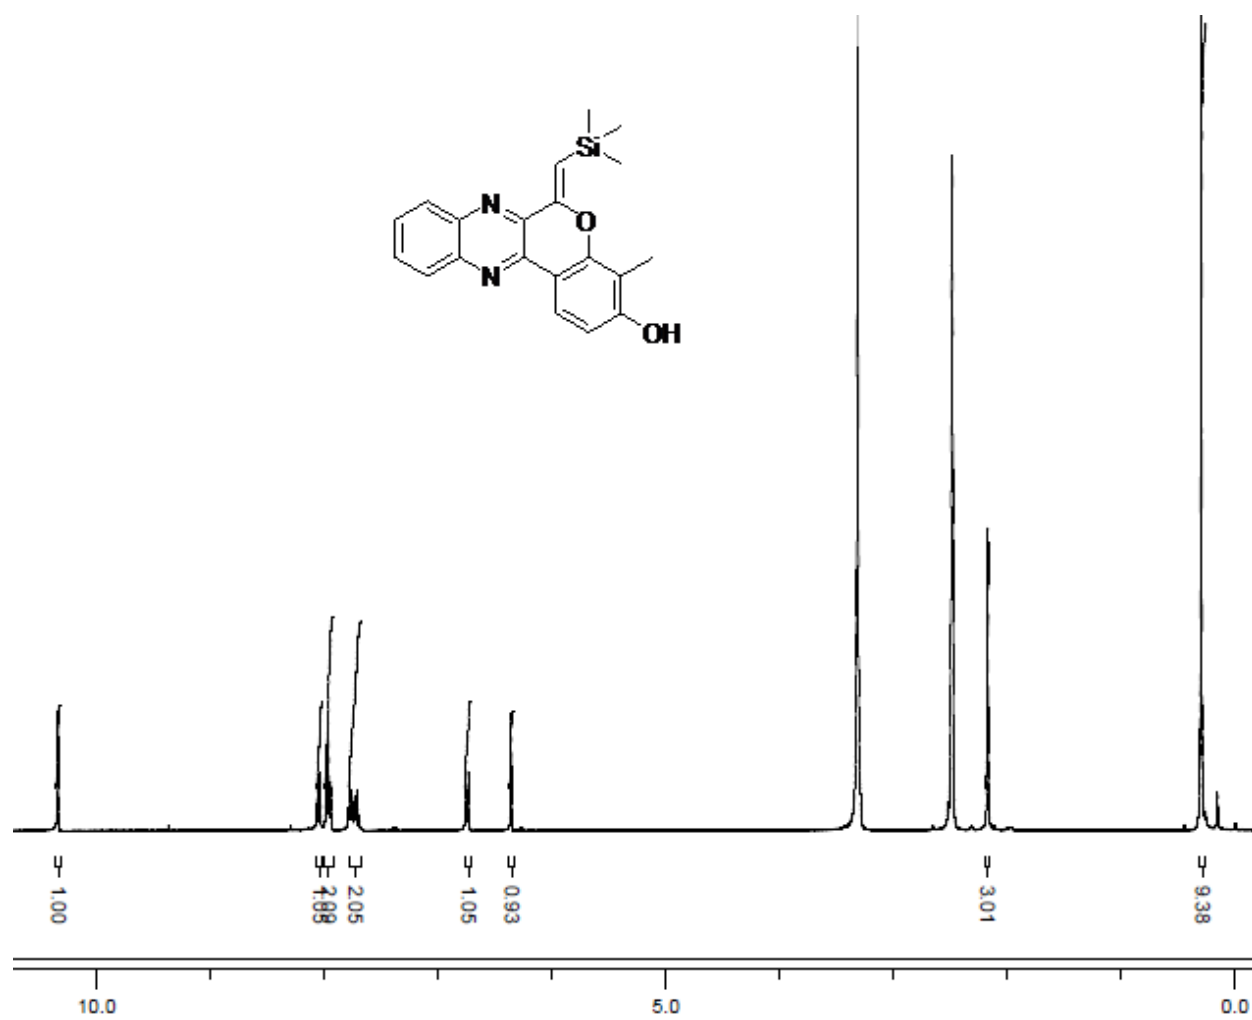

**5g**  $^{13}\text{C}$  NMR (100 MHz,  $\text{DMSO-}d_6$ )

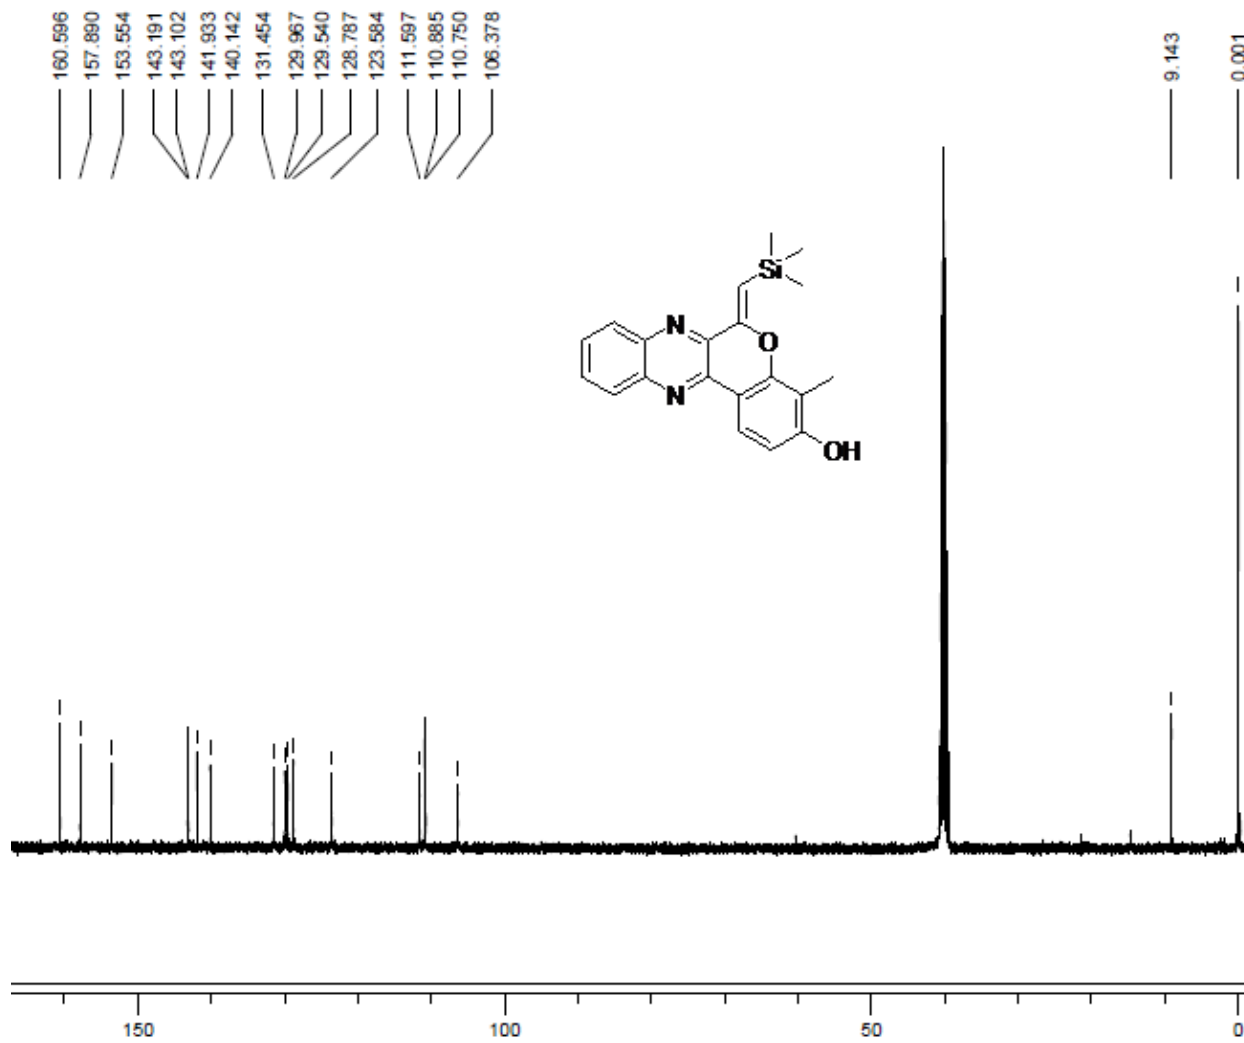

5h  $^1\text{H}$  NMR (400 MHz,  $\text{DMSO-}d_6$ )

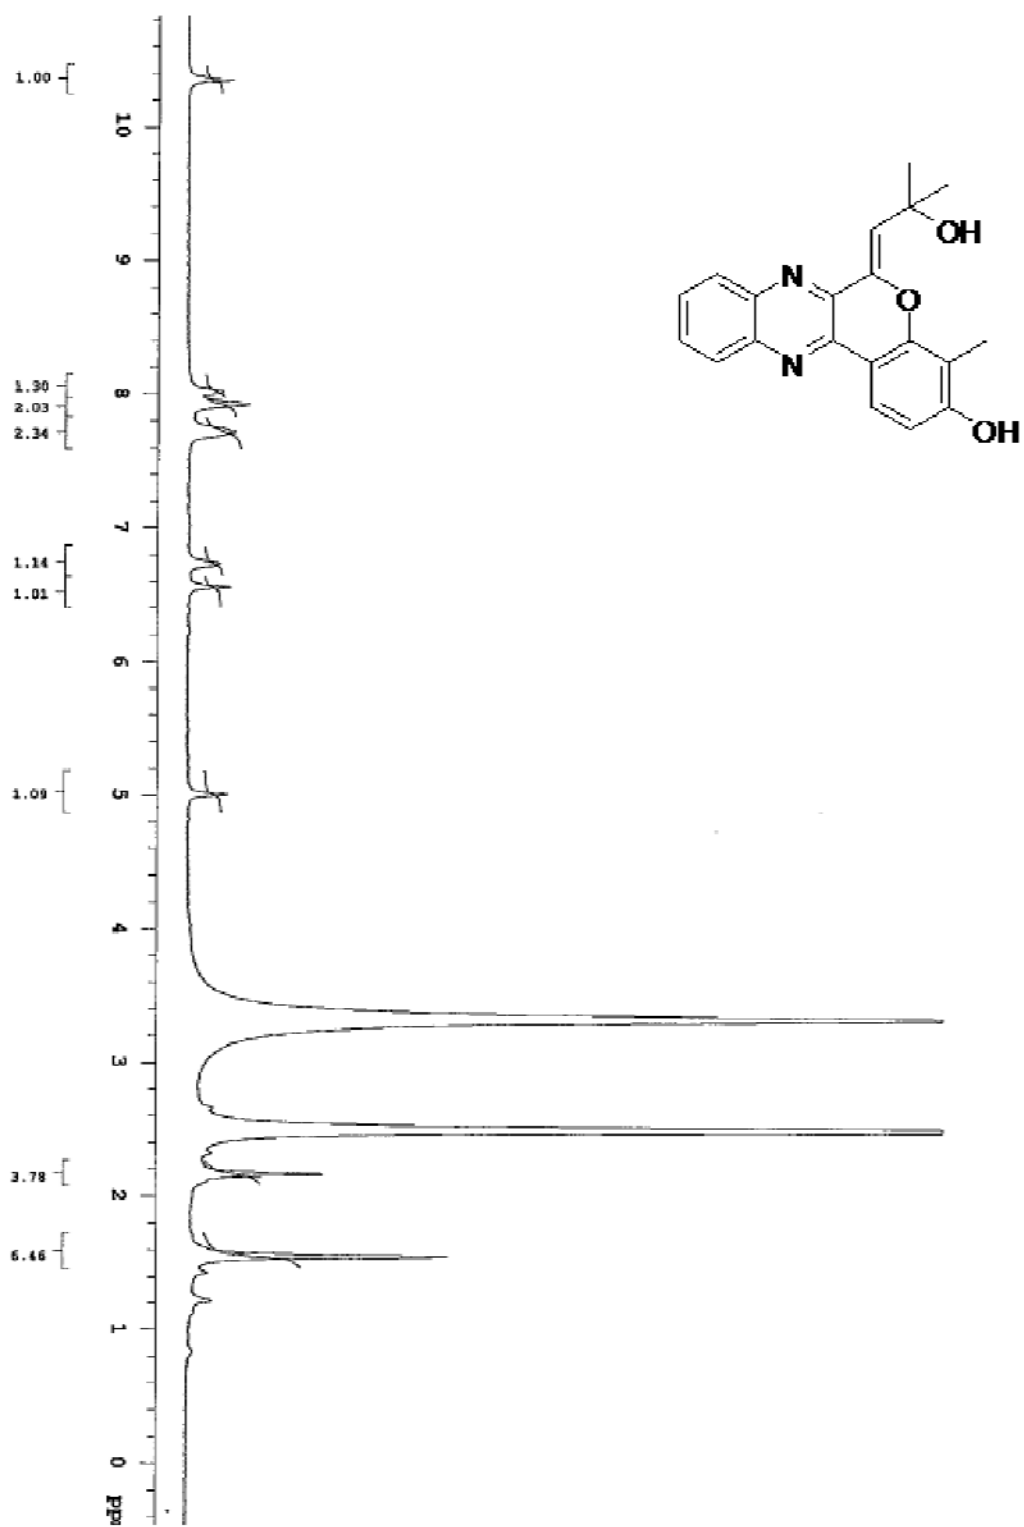

**5h**  $^{13}\text{C}$  NMR (100 MHz, DMSO- $d_6$ )

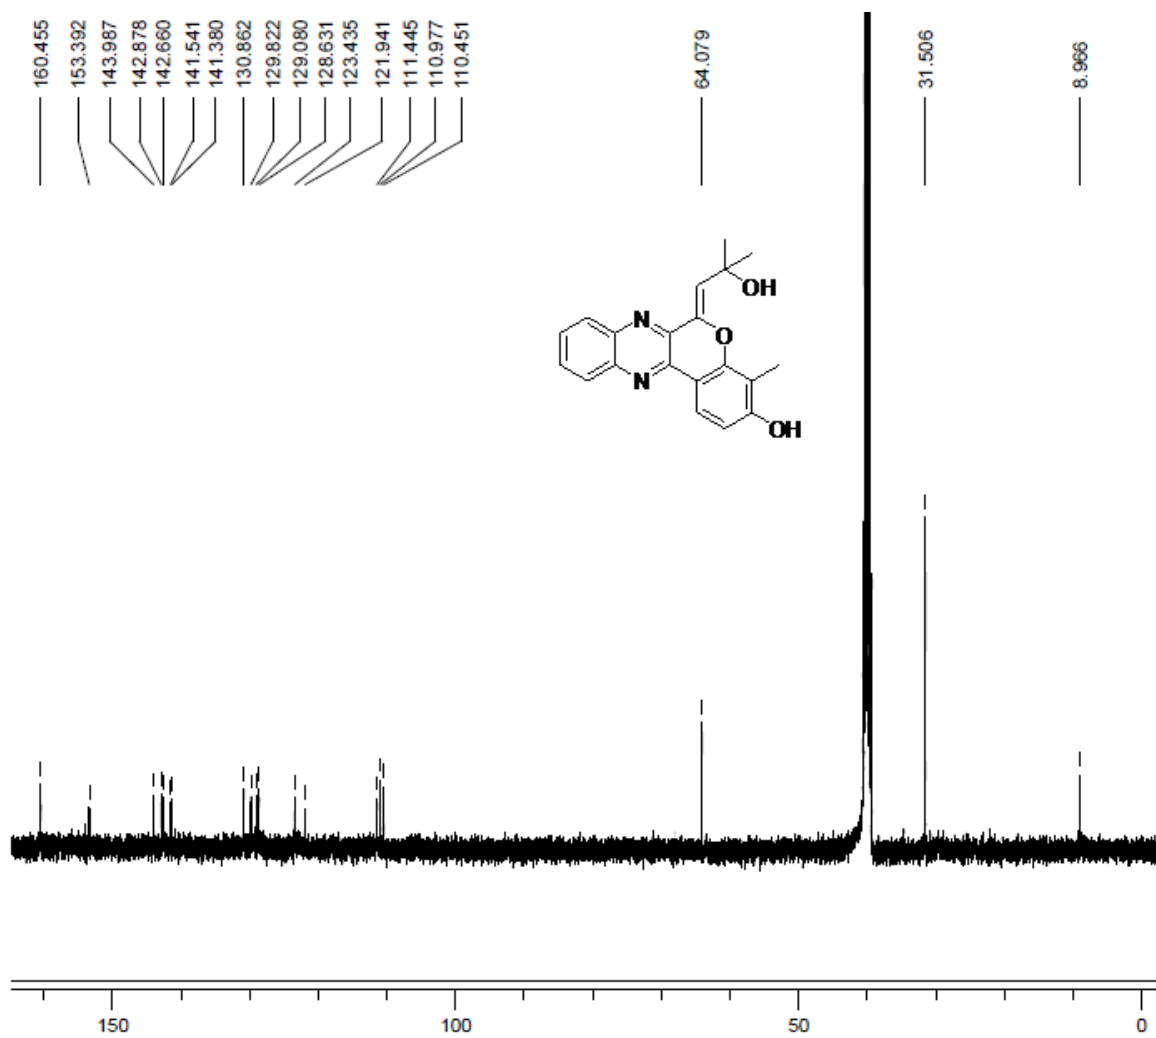

5i  $^1\text{H}$  NMR (400 MHz,  $\text{DMSO-}d_6$ )

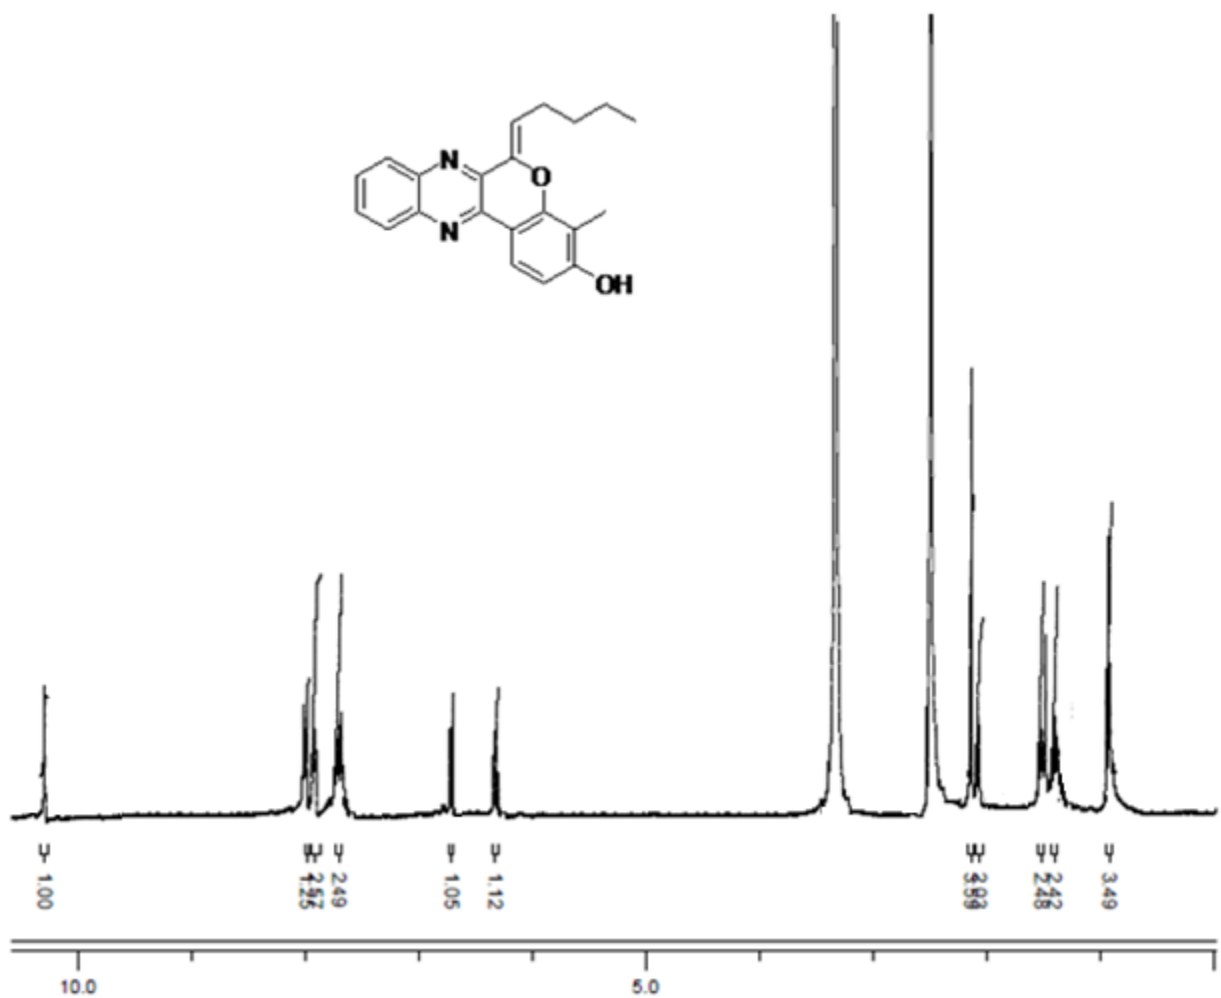

**5i**  $^{13}\text{C}$  NMR (100 MHz,  $\text{DMSO-}d_6$ )

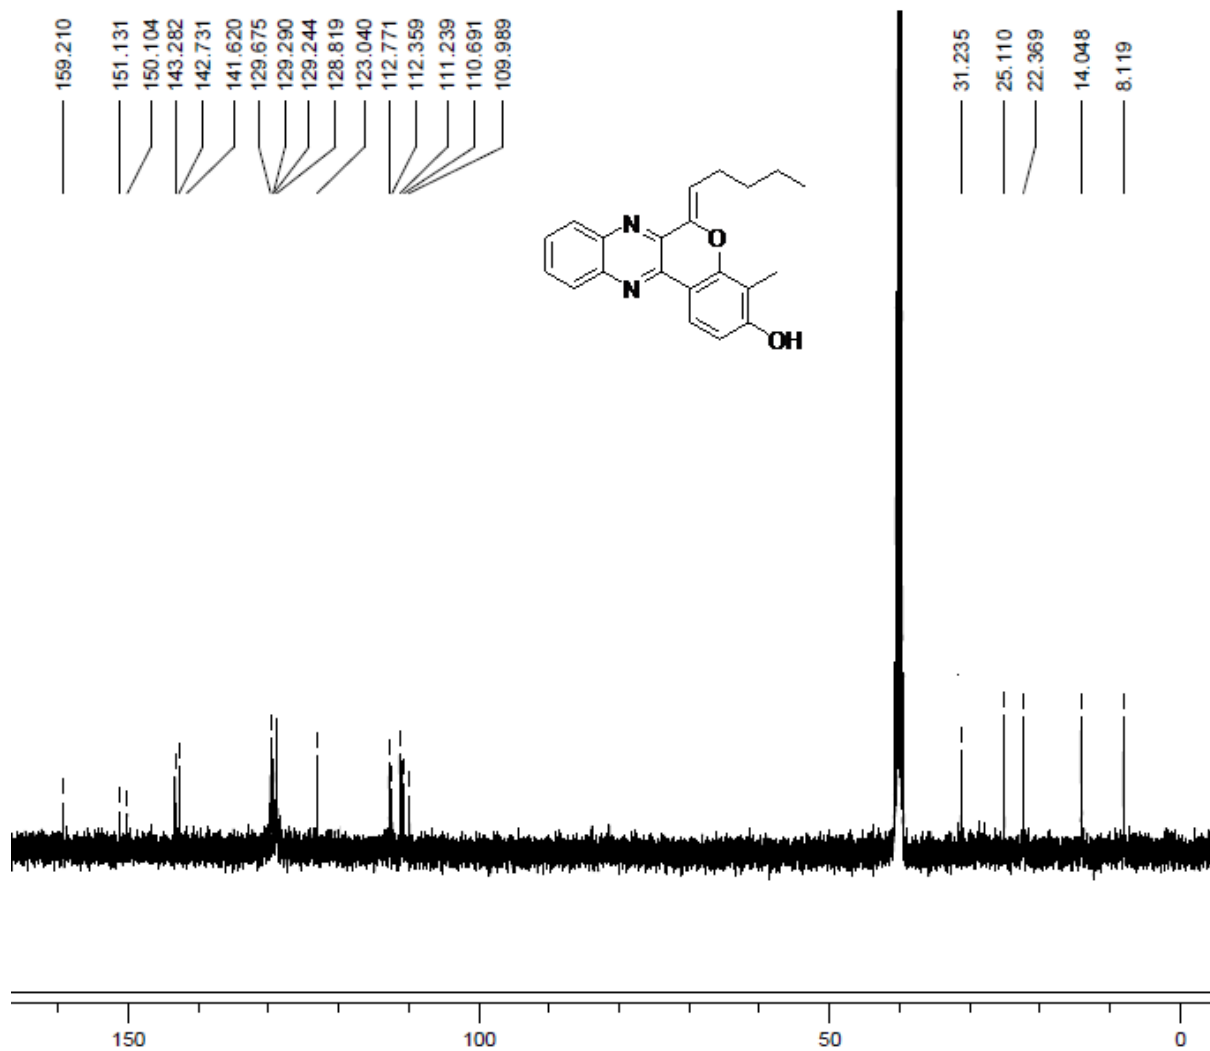

5j  $^1\text{H}$  NMR (400 MHz,  $\text{DMSO-}d_6$ )

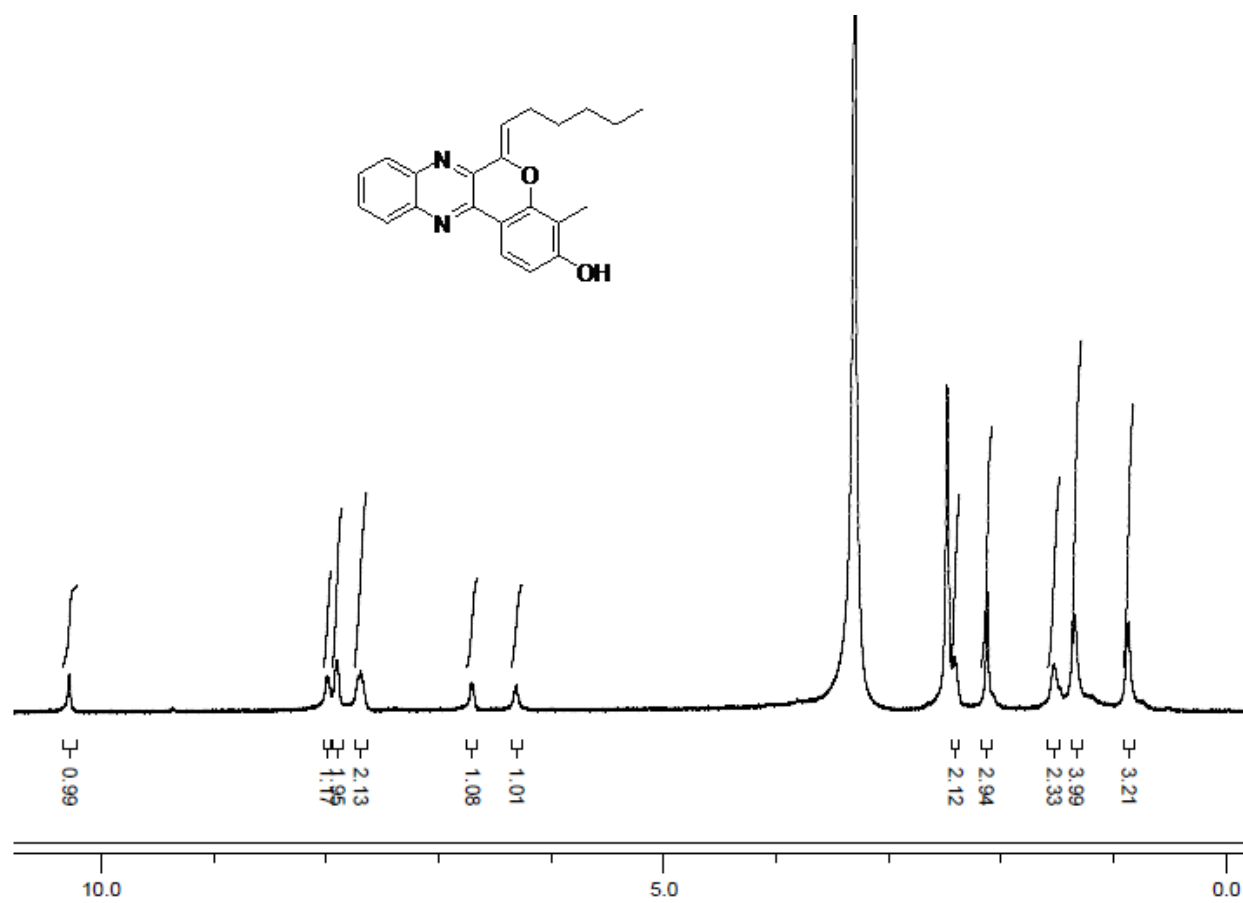

5j  $^{13}\text{C}$  NMR (100 MHz,  $\text{DMSO-}d_6$ )

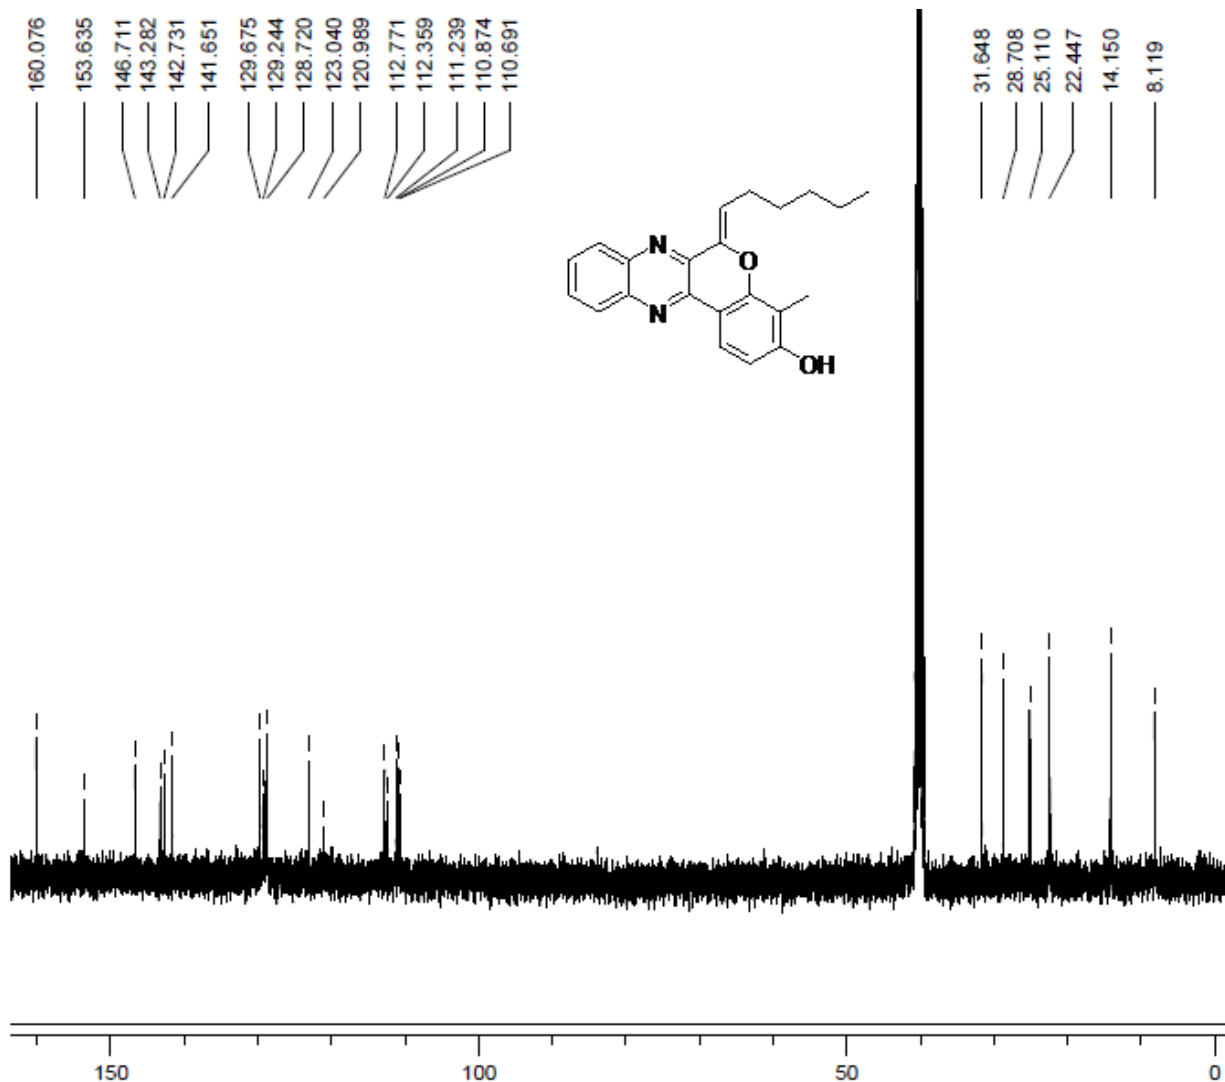



**5k**  $^1\text{H}$  NMR (400 MHz,  $\text{DMSO-}d_6$ )

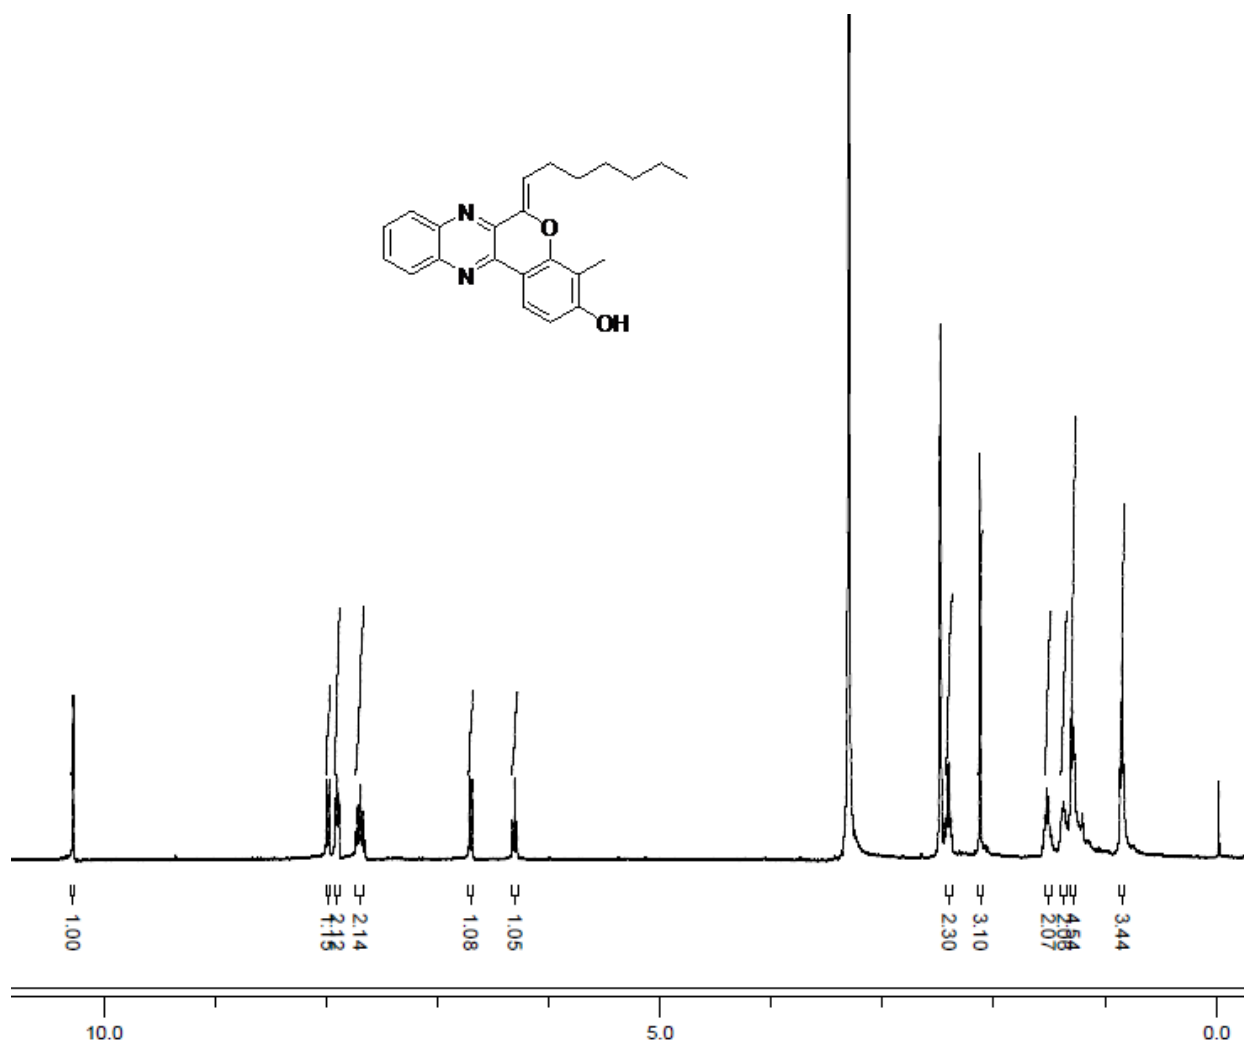

**5k**  $^{13}\text{C}$  NMR (100 MHz,  $\text{DMSO-}d_6$ )

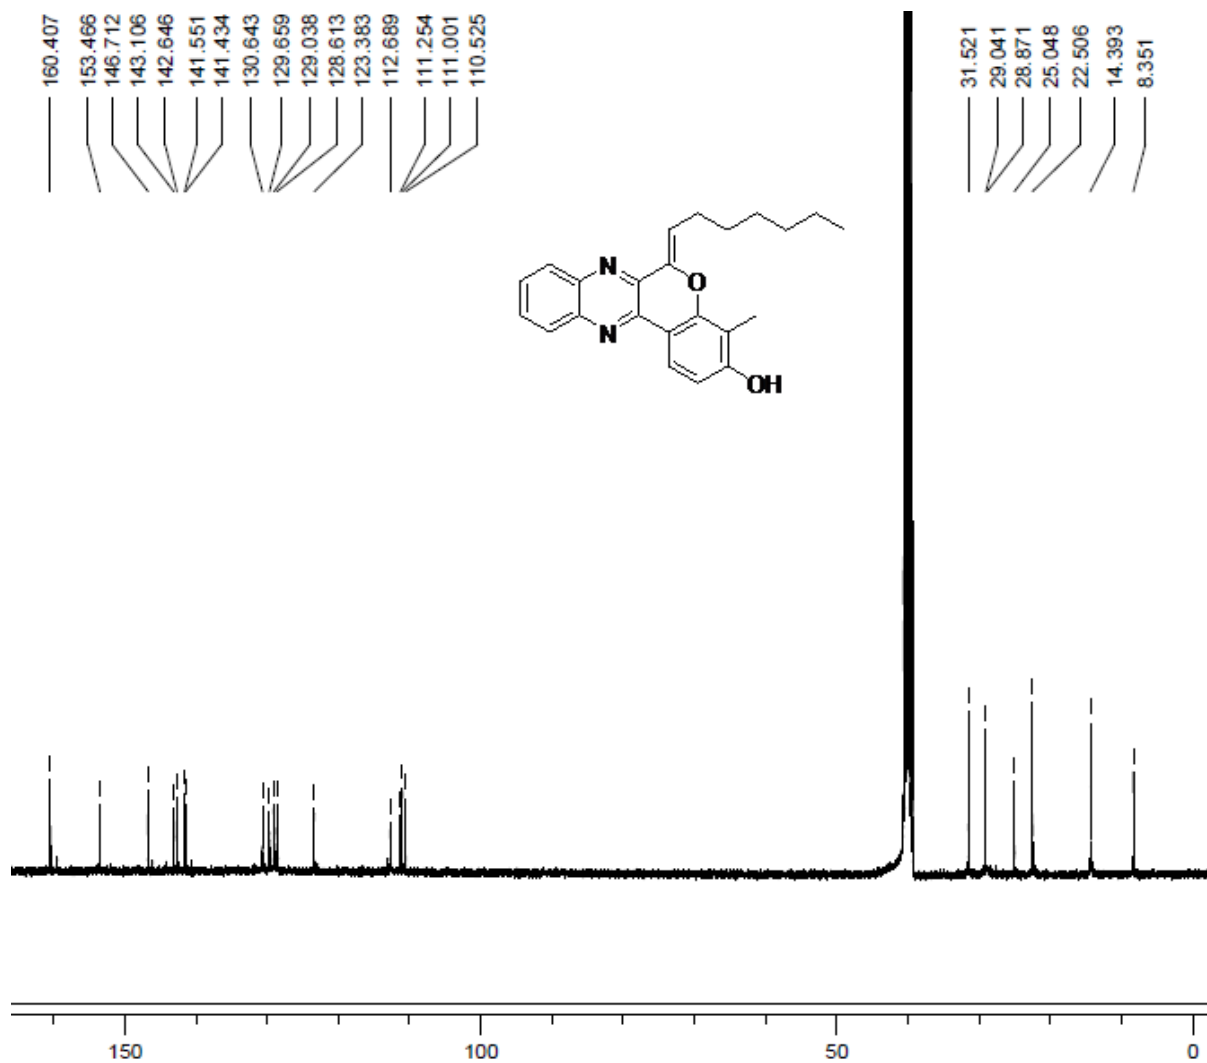

51  $^1\text{H}$  NMR (400 MHz,  $\text{DMSO-}d_6$ )

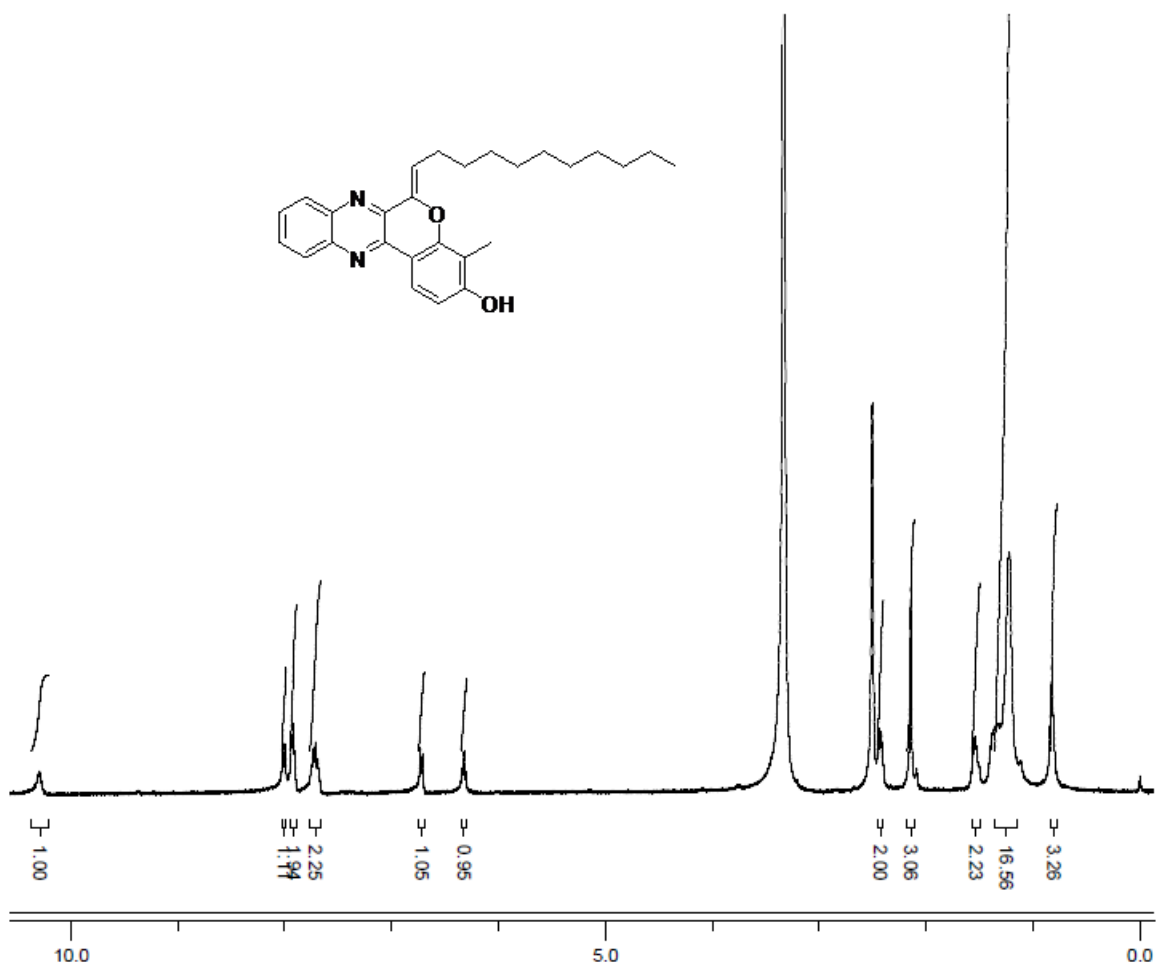

51  $^{13}\text{C}$  NMR (100 MHz, DMSO- $d_6$ )

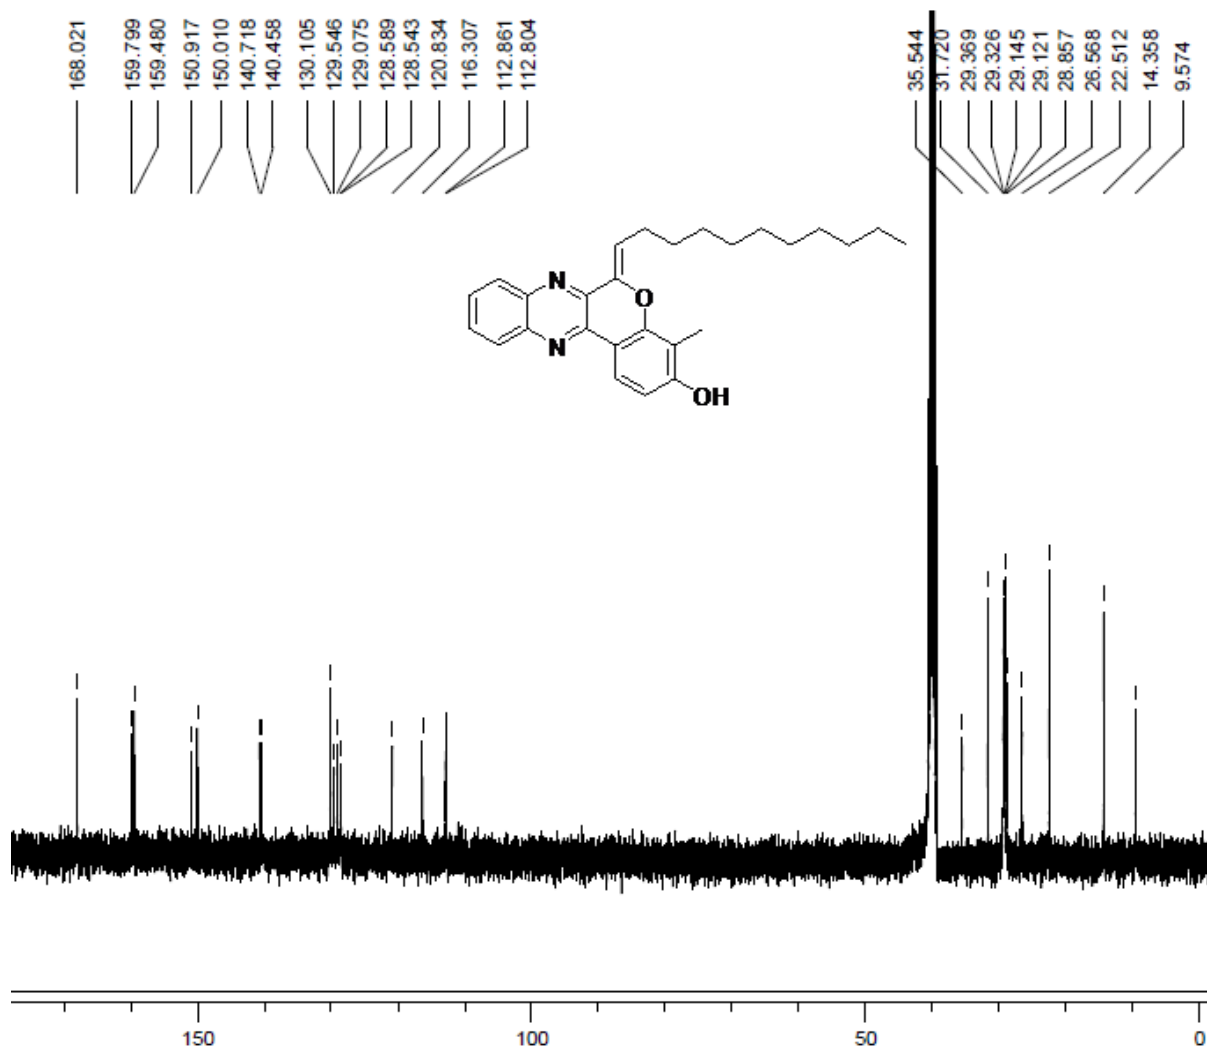

**5kk**  $^1\text{H}$  NMR (400 MHz,  $\text{CDCl}_3$ )

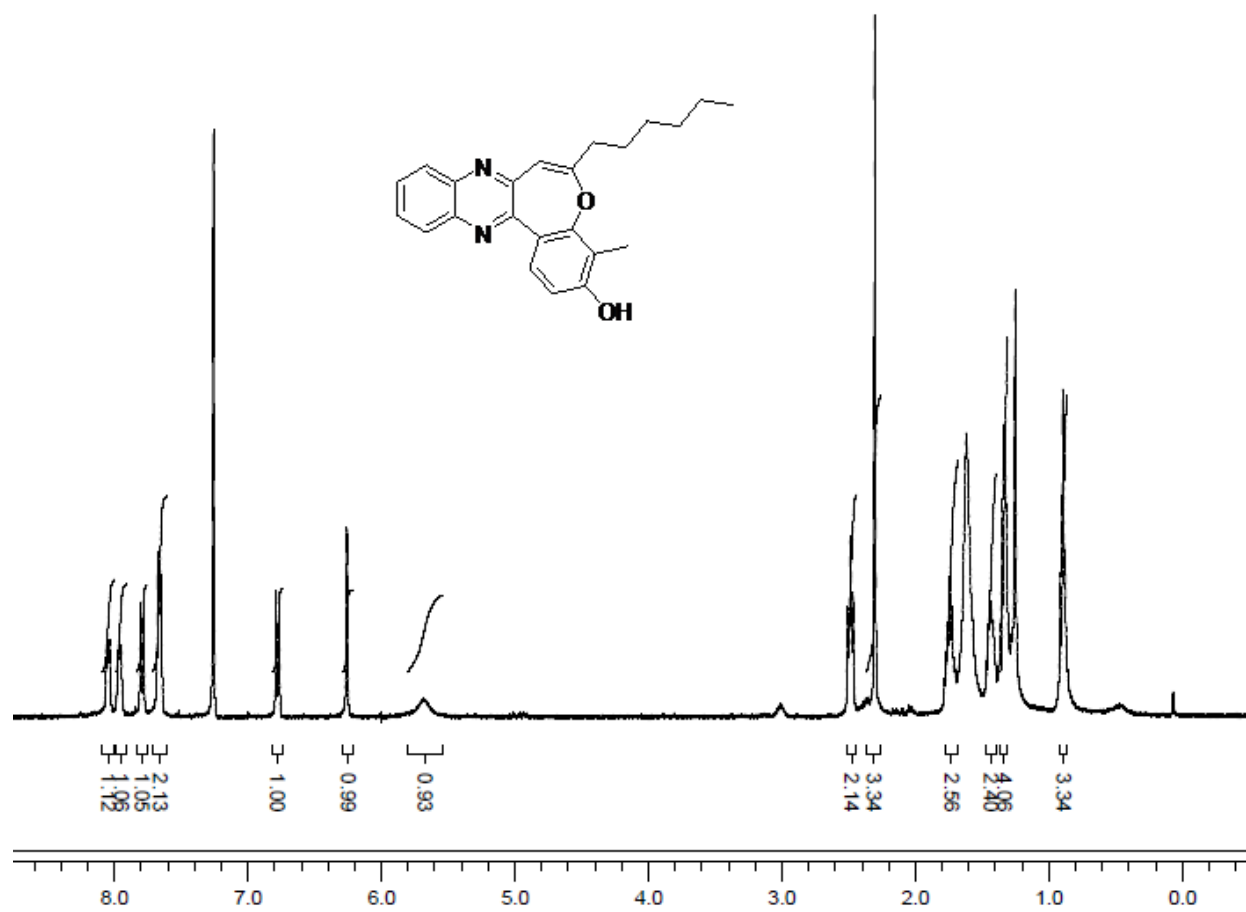

**5kk**  $^{13}\text{C}$  NMR (100 MHz,  $\text{CDCl}_3$ )

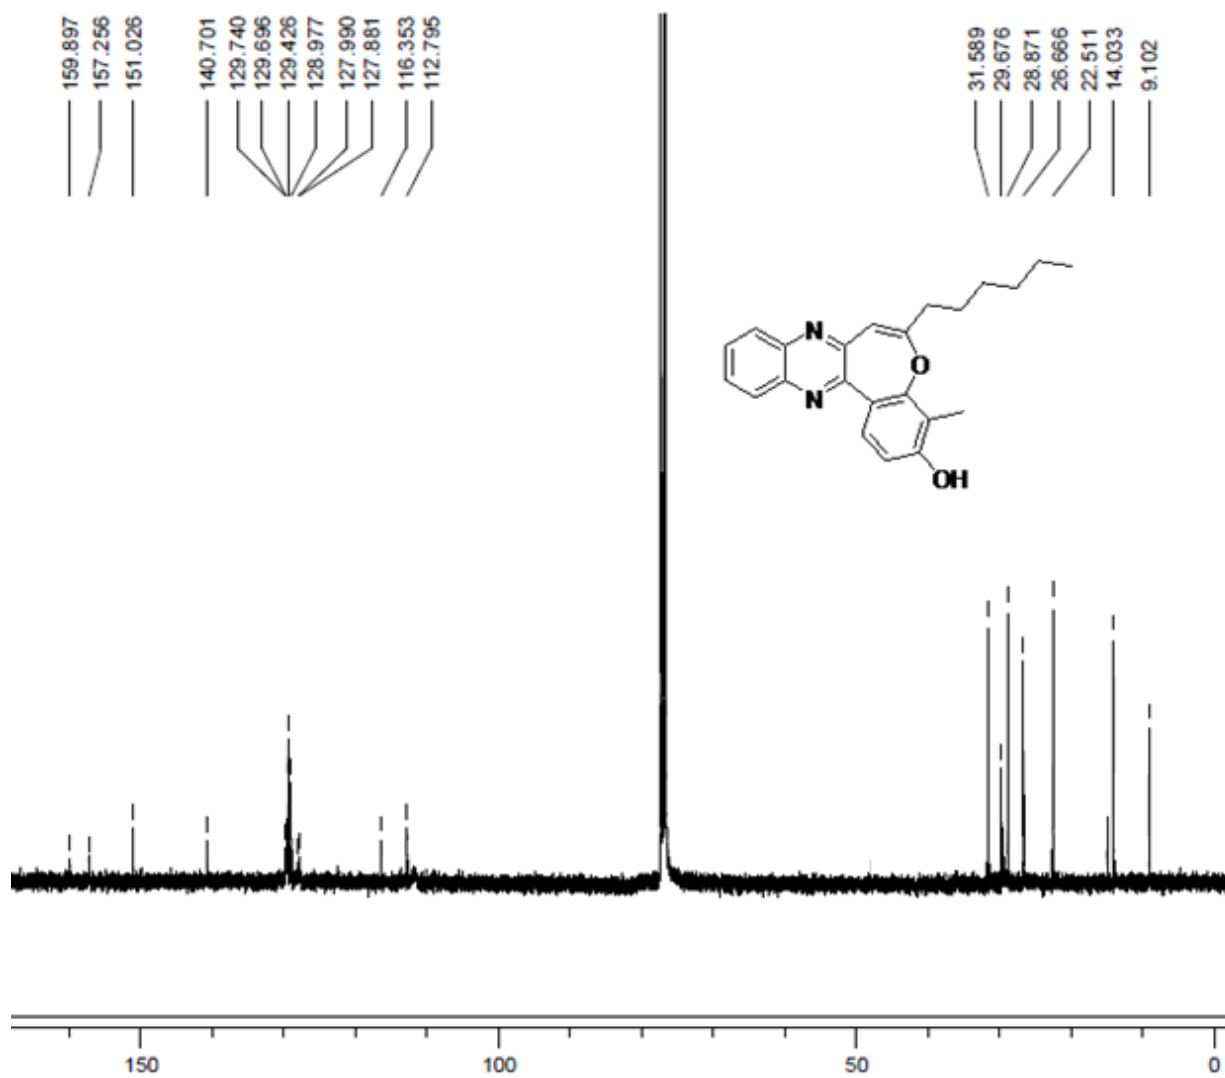

6  $^1\text{H}$  NMR (400 MHz,  $\text{DMSO-}d_6$ )

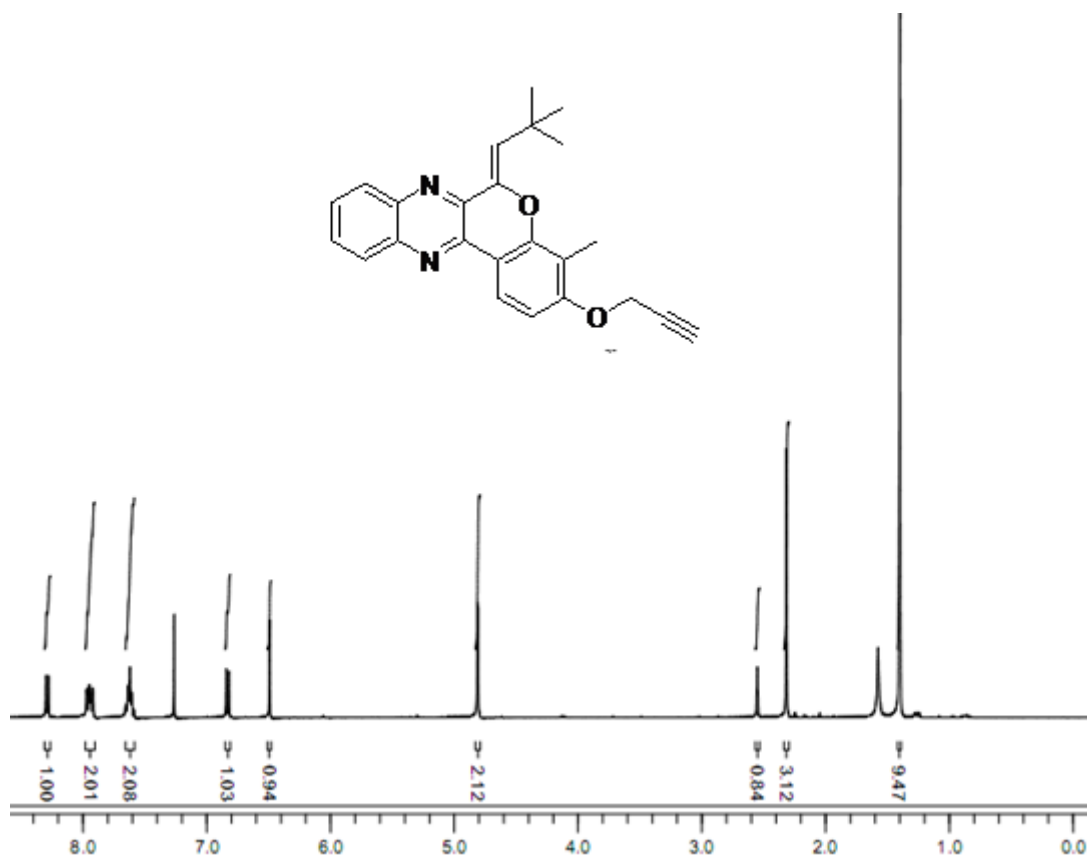

6  $^{13}\text{C}$  NMR (100 MHz,  $\text{DMSO-}d_6$ )

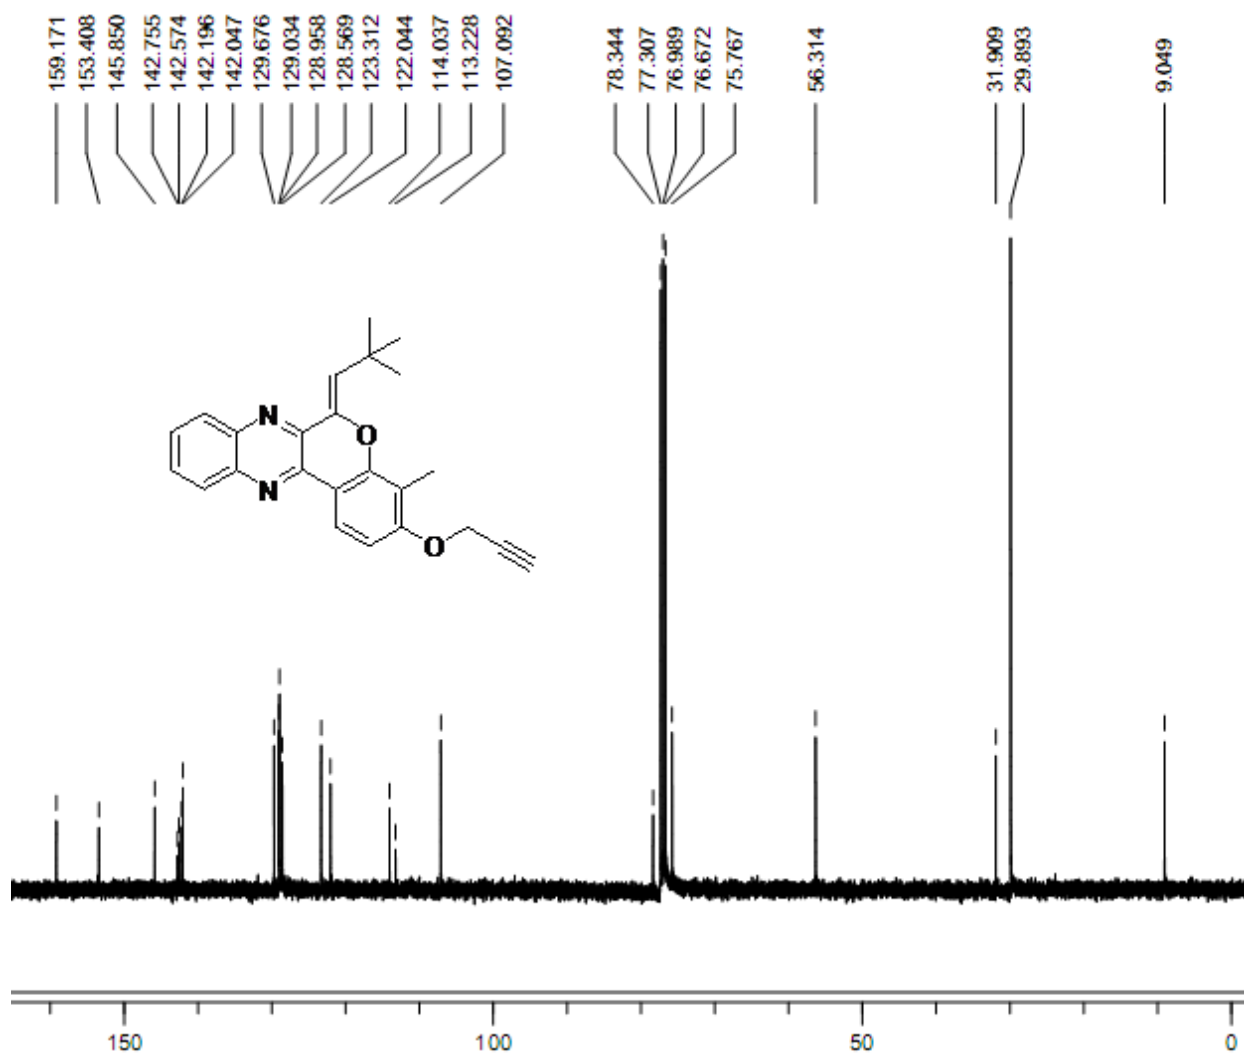



**8**  $^1\text{H}$  NMR (400 MHz,  $\text{DMSO-}d_6$ )

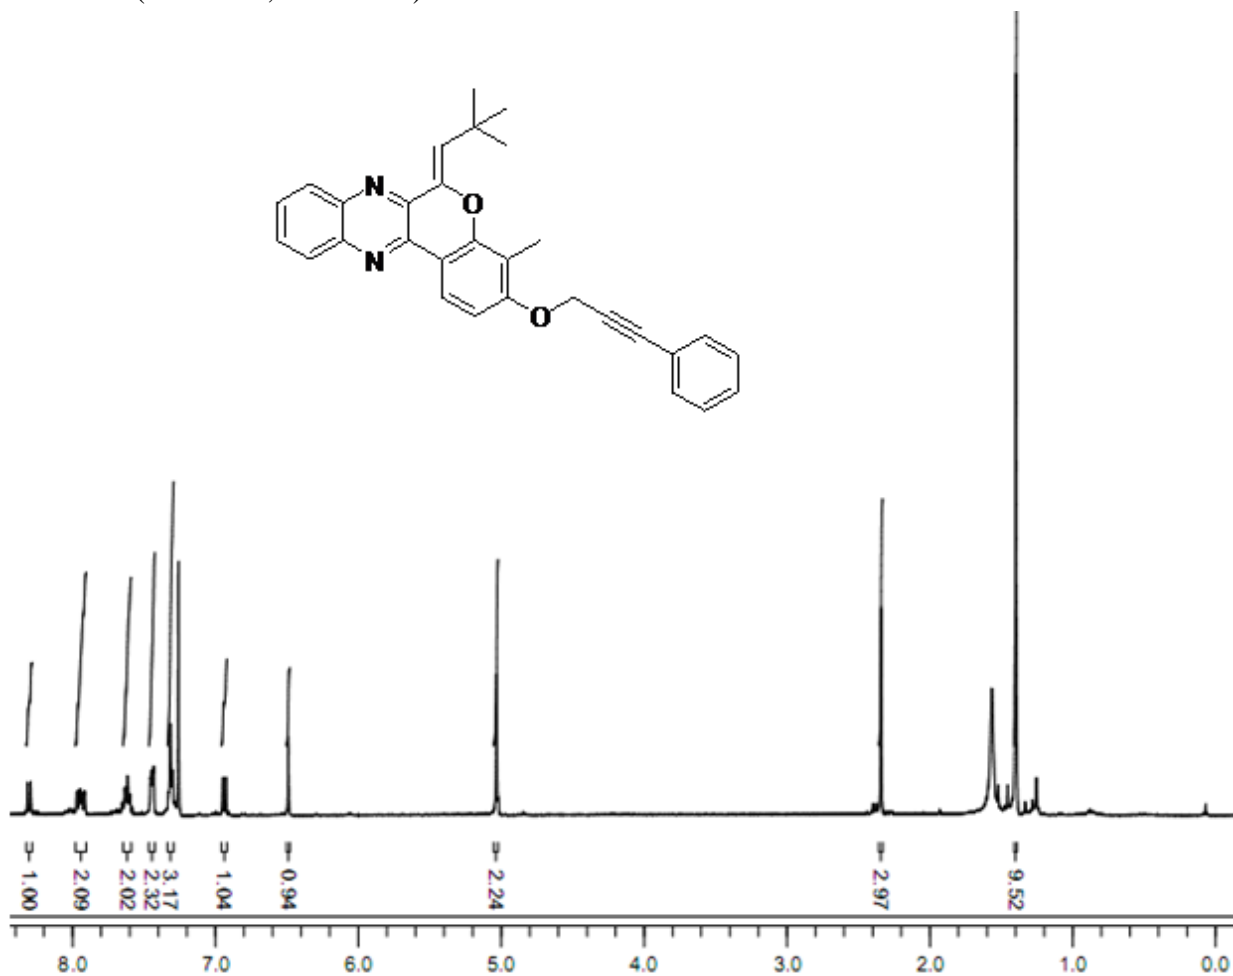

**8**  $^{13}\text{C}$  NMR (100 MHz,  $\text{DMSO-}d_6$ )

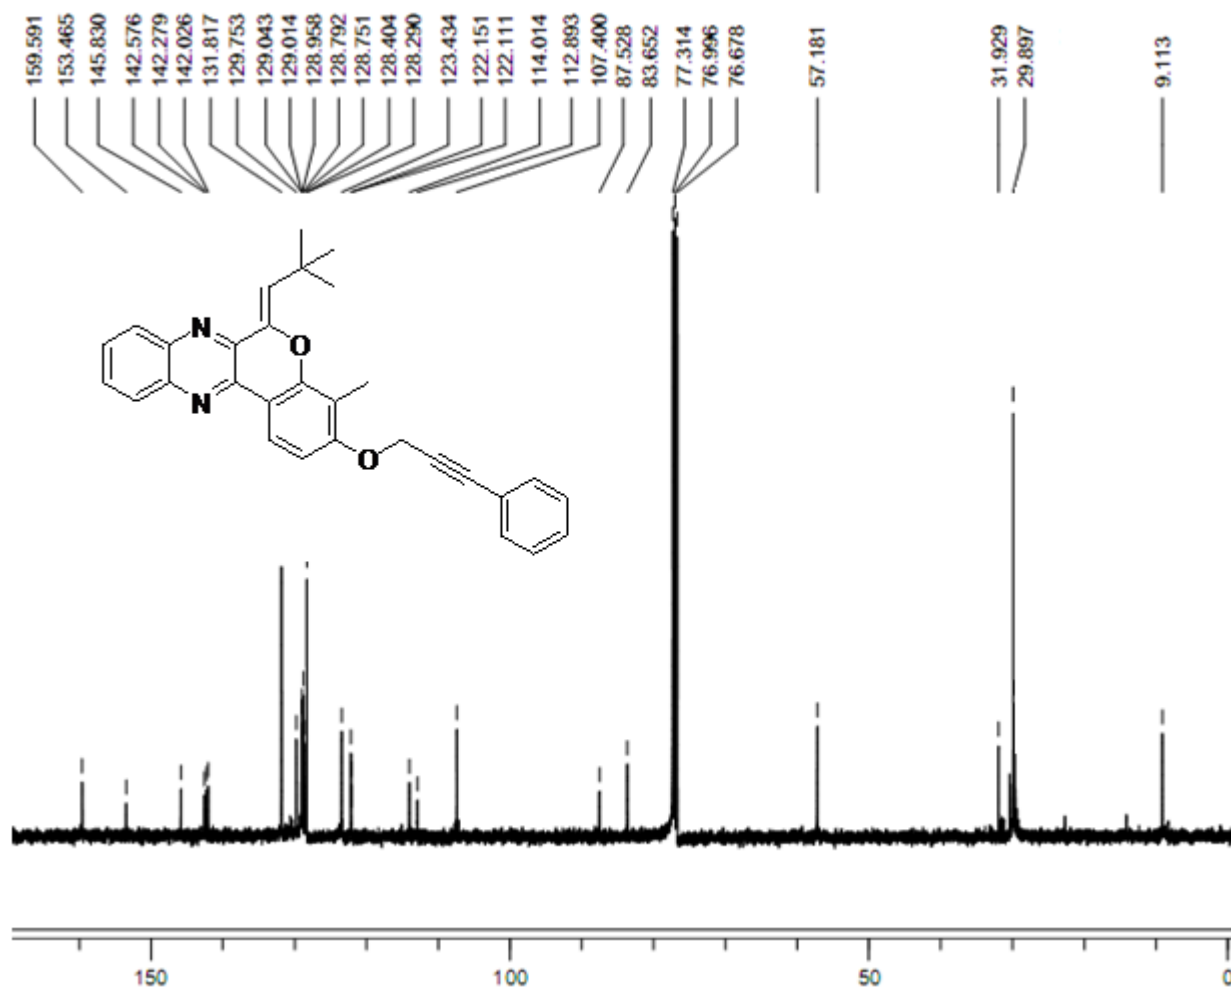

Supplement: c2ob25416f.pdf [file c2ob25416f.pdf]
